# Supplementary material for: Presenting a new fluorescent probe, methyl(10-phenylphenanthren-9-yl)sulfane sensitive to the polarity and rigidity of the microenvironment: applications toward microheterogeneous systems
Source: Royal Society of Chemistry journal article supplement (doi:10.1039/d4ra05565a), 2024-01-01
Supplement: d4ra05565a1.pdf [file d4ra05565a1.pdf]

### Supplementary Information

#### **Presenting a new fluorescent probe, methyl(10-phenylphenanthren-9-yl)sulfane sensitive to the polarity and rigidity of microenvironment: Applications toward microheterogeneous systems**

Shalini Dyagala<sup>a</sup>, Nilanjana Mukherjee<sup>a,b#</sup>, Sayantan Halder<sup>a,c#</sup>, Heena Charaya<sup>d#</sup>, Mohammed Muzaffar-Ur-Rehman<sup>e</sup>, Sankaranarayanan Murugesan<sup>e</sup>, Shamik Chakraborty<sup>d\*</sup>, Tanmay Chatterjee<sup>a\*</sup>, Subit Kumar Saha<sup>a\*</sup>

<sup>a</sup> Department of Chemistry, Birla Institute of Technology & Science (BITS) Pilani,  
Hyderabad Campus, Hyderabad, Telangana 500078, India

<sup>b</sup> Present address: Department of Chemistry, Indian Institute of Technology Roorkee,  
Uttarakhand 247667, India

<sup>c</sup> Present address: Interdisciplinary Nanoscience Center (iNANO), Aarhus University, Gustav  
Wieds Vej 14, 8000 Aarhus C, Denmark

<sup>d</sup> Department of Chemistry, Birla Institute of Technology & Science (BITS) Pilani, Pilani  
Campus, Rajasthan, 333031, India

<sup>e</sup> Department of Pharmacy, Birla Institute of Technology & Science (BITS) Pilani, Pilani  
Campus, Rajasthan, 333031, India

#Authors with equal contribution

#### **SECTION S1:**

**General Experimental Information.** All reagents and solvents, including DMSO were purchased from BLD Pharma, TCI, and other local chemical companies. Flash column chromatography was performed using silica gel (100–200 mesh). The synthesized products were characterized by <sup>1</sup>H, <sup>13</sup>C, and <sup>19</sup>F NMR. NMR spectra were recorded on a Bruker 400 MHz instrument (400 MHz for <sup>1</sup>H NMR and 100 MHz for <sup>13</sup>C NMR). <sup>1</sup>H NMR experiments are reported in units, parts per million (ppm), and were measured relative to residual chloroform (7.26 ppm) in the deuterated solvent. <sup>13</sup>C NMR spectra are reported in ppm relative to deuteriochloroform (77.00 ppm), and all were obtained with <sup>1</sup>H decoupling. Coupling constants are reported in hertz. Reactions were monitored by thin layer chromatography (TLC) and <sup>1</sup>H NMR of the crude reaction mixture using 1,3,5-trimethoxybenzene as the internal standard. Mass spectral data of unknown compounds were obtained on a high-resolution mass

spectrometer, HRMS (6546 Q-TOF LC/MS, Agilent). Melting points of unknown compounds were recorded on a KRUSS Optronic M3000 apparatus.

### General Experimental Procedure for the Synthesis of MPPS and MTPS.

The designed 9-methylsulfenylphenanthrene derivatives *i.e.*, MPPS and MTPS were synthesized by following one<sup>60</sup> of our recently developed synthetic methods to access chalcogenyl phenanthrenes<sup>61-63</sup> using DMSO as the source of methylsulfenyl group (SMe). The synthetic route to MPPS and MTPS is presented in Scheme S1 given below. Both MPPS and MTPS were synthesized starting from the commercially available [1,1'-biphenyl]-2-amine **1** in three steps following literature protocols. At first **1** was converted to 2-iodo-1,1'-biphenyl **2** in 85% yield by *in situ* diazotization followed by the iodination of the diazonium salt (Step-1). Next, Pd-catalysed Sonogashira cross-coupling of **2** with two aryl alkynes, *i.e.*, phenylacetylene and 1-ethynyl-2-methylbenzene furnished 2-(phenylethynyl)-1,1'-biphenyl **3** in 85% and 2-(*o*-tolylethynyl)-1,1'-biphenyl **4** in 67% yield respectively. Finally, iodine-catalyzed methylsulfenylative annulation of **3** and **4** with DMSO in the presence of trifluoroacetic anhydride (3 equiv) at 120 °C furnished the desired products MPPS **5** in 88% and MTPS **6** in 63%, respectively.

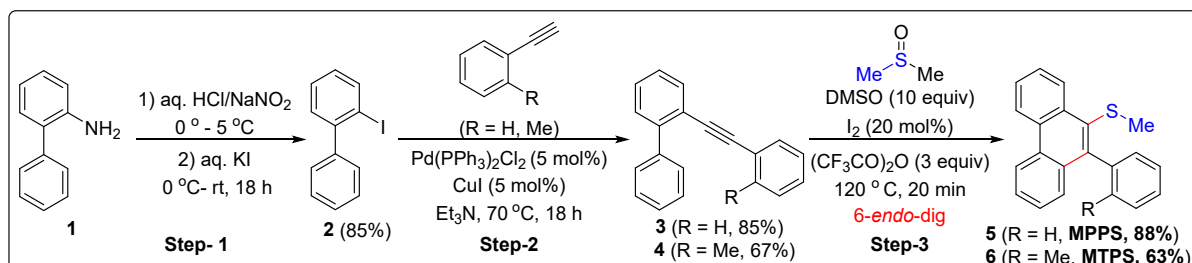

**Scheme S1.** Synthesis of MPPS and MTPS from commercially available [1,1'-biphenyl]-2-amine **1** in three steps.

The structures of MPPS<sup>60</sup> and MTPS were confirmed by <sup>1</sup>H and <sup>13</sup>C Nuclear Magnetic Resonance (NMR) (Figure S1) spectroscopy and High-Resolution Mass Spectrometry (HRMS).<sup>37,60,64</sup>

### Experimental Procedure for the Synthesis of Methyl(10-(*o*-tolyl)phenanthren-9-yl)sulfane (MTPS) (**6**):

**Step-1:** [1,1'-biphenyl]-2-amine **1** (0.85 g, 5 mmol) was taken to aqueous HCl (2.6 mL, H<sub>2</sub>O 8.3 mL) solution. The reaction mixture was cooled to 0-5 °C. After 5 min aqueous NaNO<sub>2</sub> solution (0.42 g in 8.3 mL H<sub>2</sub>O) was added dropwise at 0-5 °C. The resulting solution turns

yellow after the addition of an aqueous KI solution (1.25 g in 8.3 mL H<sub>2</sub>O). The reaction mixture was stirred vigorously for 18 h. After the completion of the reaction, the solution was quenched by the addition of aqueous Na<sub>2</sub>S<sub>2</sub>O<sub>3</sub> solution. The resulting solution was extracted by ethyl acetate (30 x 3 mL) and washed with water (30 mL). The combined organic layer was dried over anhydrous Na<sub>2</sub>SO<sub>4</sub>. The solvent was evaporated under reduced pressure to get the crude product which was purified by flash column chromatography on silica gel to afford 2-iodo-1,1'-biphenyl **2** (1.3 g, 4.3 mmol) in 85% yield.

The product was characterized fully by the <sup>1</sup>H and <sup>13</sup>C-NMR spectroscopy and the corresponding analytical data also matched with the reported literature.<sup>37</sup>

**Step-2:** In an RBF, PdCl<sub>2</sub>(PPh<sub>3</sub>)<sub>2</sub> (0.150 g, 0.22 mmol) and CuI (0.041 g, 0.22 mmol) were added to a solution of 2-iodo-1,1'-biphenyl (1.3 g, 4.3 mmol) in Et<sub>3</sub>N (13 mL) under nitrogen atmosphere in a standard Schlenk-line process. The reaction mixture was stirred for 5 min. Then, 1-ethynyl-3-methylbenzene (566 μL, 5.16 mmol, 1.2 equiv) was added to the RBF. The resulting mixture was then heated under a nitrogen atmosphere at 70 °C for 18 h. The reaction mixture was allowed to cool to room temperature. Then, the solvent was evaporated under reduced pressure. The crude reaction mixture was extracted with ethyl acetate thrice (3 x 30 mL). The combined organic layer was washed with water three times (3 x 30 mL) and concentrated under reduced pressure to get the crude product which was purified by column chromatography through silica gel to afford 2-(*o*-tolylethynyl)-1,1'-biphenyl **4** (0.72 g, 2.7 mmol) in 67% yield.

The product was characterized fully by the <sup>1</sup>H and <sup>13</sup>C-NMR spectroscopy and the corresponding analytical data also matched with the reported literature.<sup>64</sup>

The other compound, 2-(phenylethynyl)-1,1'-biphenyl **3** was also synthesized by following the above-mentioned protocol and characterized fully by the <sup>1</sup>H and <sup>13</sup>C-NMR spectroscopy.<sup>60</sup>

**Step-3:** To a solution of 2-(*o*-tolylethynyl)-1,1'-biphenyl **4** (0.134 g, 0.5 mmol, 1 equiv) in DMSO **2a** (0.36 mL, 5 mmol, 1.4 M), I<sub>2</sub> (0.0254 g, 0.1 mmol) was added in a flame-dried RBF. Then, TFAA (0.212 mL, 1.5 mmol) was added to the RBF and the reaction mixture was stirred at 120 °C under an aerobic atmosphere. The progress of the reaction was monitored by TLC. After completion of the reaction, the resulting solution was extracted with ethyl acetate thrice (3 x 10 mL) and the combined organic layer was washed with water (3 x 10 mL). The solvent was evaporated under reduced pressure to afford the crude product which was purified by flash

column chromatography through silica gel to afford the product, methyl(10-(*o*-tolyl)phenanthren-9-yl)sulfane (MTPS) **6** (0.099 g, 0.31 mmol) in 63% yield.

The other product, methyl(10-phenylphenanthren-9-yl)sulfane<sup>60</sup> (MPPS) **5** was also synthesized by following the above-mentioned protocol and characterized fully by the <sup>1</sup>H and <sup>13</sup>C-NMR spectroscopy.<sup>60</sup>

### Analytical Data

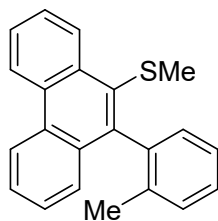

**Methyl(10-(*o*-tolyl)phenanthren-9-yl)sulfane (MTPS, **6**):** White solid; mp = 82–84 °C; <sup>1</sup>H NMR (400 MHz, CDCl<sub>3</sub>) δ 8.87 – 8.85 (m, 1H), 8.81 – 8.79 (m, 1H), 8.76 (d, *J* = 8.3 Hz, 1H), 7.76 – 7.73 (m, 2H), 7.66 (td, *J* = 7.0, 3.5 Hz, 1H), 7.45 – 7.41 (m, 3H), 7.35 (dd, *J* = 7.0, 4.8 Hz, 1H), 7.31 (dd, *J* = 8.3, 0.9 Hz, 1H), 7.19 (d, *J* = 8.0 Hz, 1H), 2.23 (s, 3H), 2.01 (s, 3H); <sup>13</sup>C NMR (100 MHz, CDCl<sub>3</sub>) δ 144.53, 140.26, 136.60, 132.05, 131.58, 131.27, 130.85, 130.64, 129.83, 129.68, 127.75, 127.64, 127.59, 127.34, 127.19, 126.87, 126.79, 125.53, 123.02, 122.56, 19.93, 19.46. HRMS (ESI), *m/z* calcd for C<sub>22</sub>H<sub>19</sub>S [M + H]<sup>+</sup> : 315.1202; found: 315.1210.

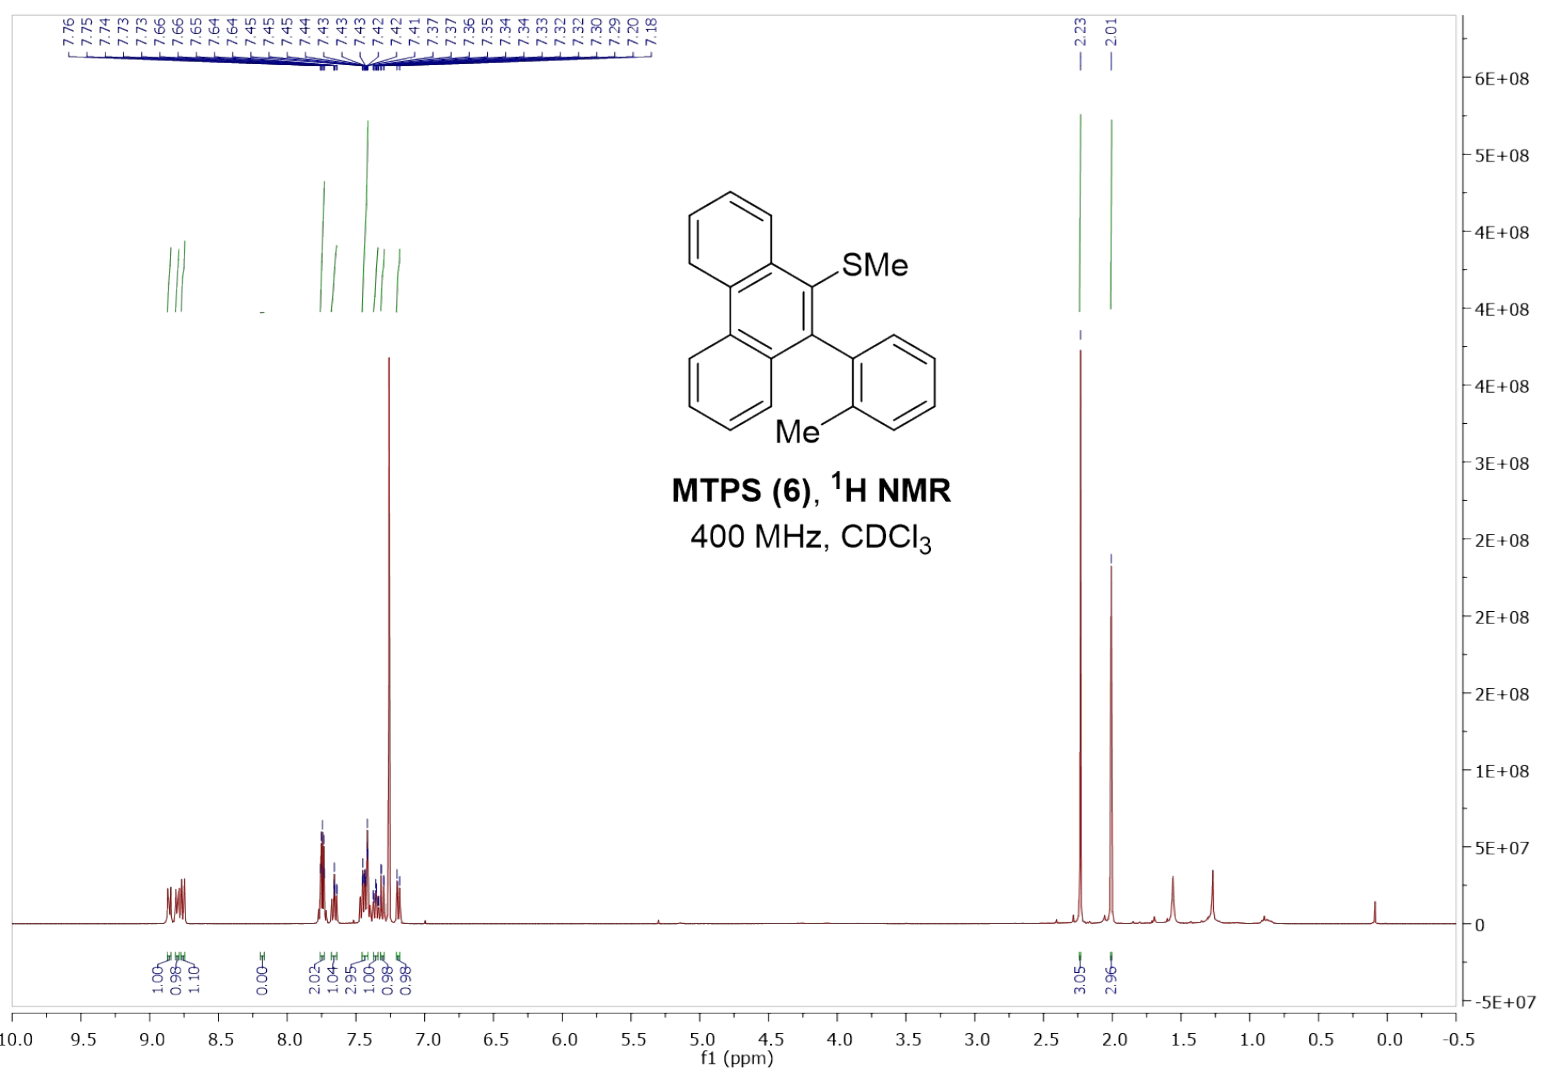

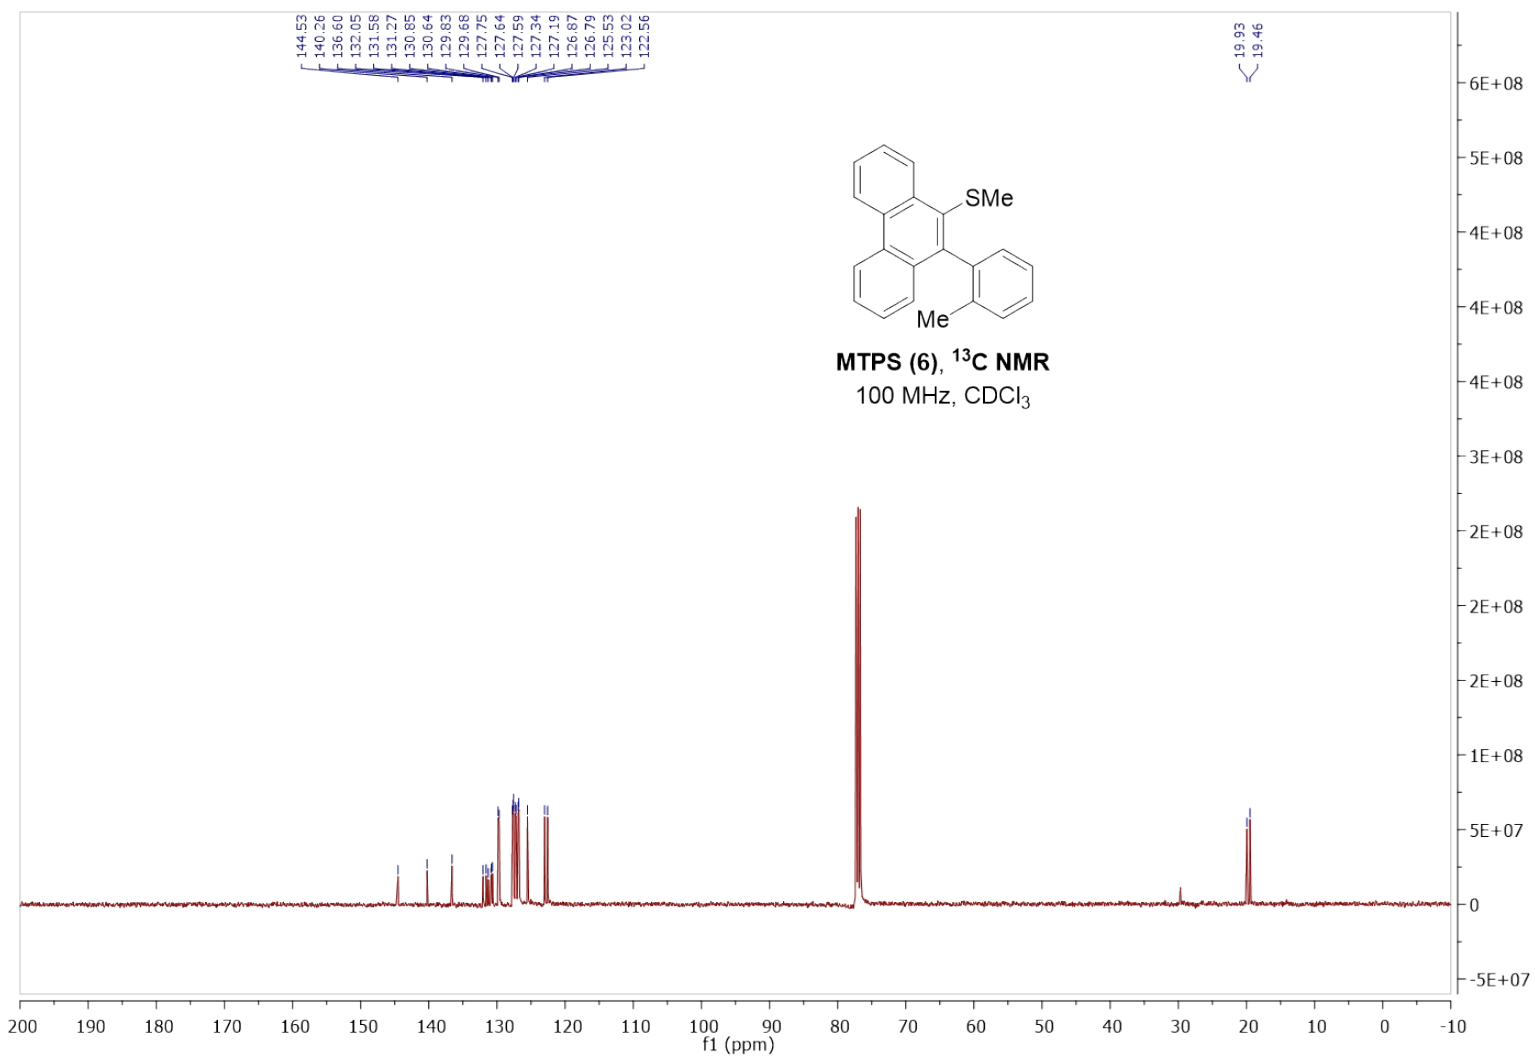

**Figure S1:**  $^1\text{H}$  and  $^{13}\text{C}$  NMR Spectra of MTPS (6)

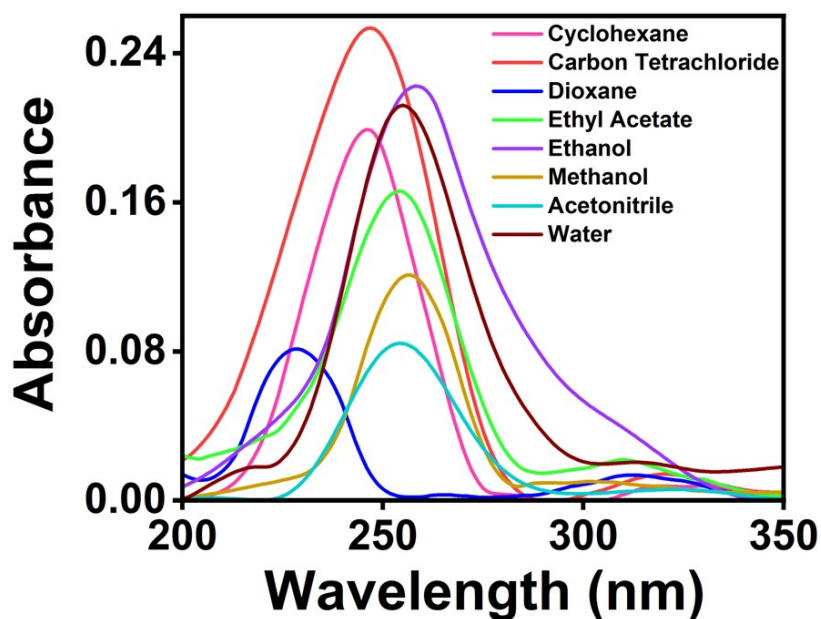

**Figure S2:** Absorption spectra of MPPS in different solvents. [MPPS] = 5.0  $\mu$ M

**Table S1.** Energy difference of E-1 and E-2 in the gas phase and PCM, and relative energy of each of E-1 and E-2 of MPPS under solvation with respect to that in the gas phase at the CAM-B3LYP/6-311++g(d,p) level.

| Energy change $\Delta E$ (kJ mol <sup>-1</sup> ) |       |
|--------------------------------------------------|-------|
| E2(gas)-E1(gas)                                  | 4.0   |
| E2(CCl <sub>4</sub> )-E1(CCl <sub>4</sub> )      | -0.4  |
| E2(MeOH)-E1(MeOH)                                | -5.2  |
| E2(ACN)-E1(ACN)                                  | -5.3  |
| E2(H <sub>2</sub> O)-E1(H <sub>2</sub> O)        | -5.3  |
| E1(CCl <sub>4</sub> )-E1(gas)                    | -9.0  |
| E1(MeOH)-E1(gas)                                 | -25.0 |
| E1(ACN)-E1(gas)                                  | -25.0 |
| E1(H <sub>2</sub> O)-E1(gas)                     | -26.0 |
| E2(CCl <sub>4</sub> )-E2(gas)                    | -13.0 |
| E2(MeOH)-E2(gas)                                 | -35.0 |
| E2(ACN)-E2(gas)                                  | -35.0 |
| E2(H <sub>2</sub> O)-E2(gas)                     | -36.0 |

**Table S2.** Dihedral angles for MPPS at the excited state (conformers at E-1 and E-2 states) in the gas phase and using PCM in MeOH solvent obtained using TD-DFT method at the CAM-B3LYP/6-311++g(d,p) level.

| Medium     | E-1                                     |                                          | E-2                                     |                                          |
|------------|-----------------------------------------|------------------------------------------|-----------------------------------------|------------------------------------------|
|            | Dihedral angle ( $\angle$ C10-C1-C2-C5) | Dihedral angle ( $\angle$ C8-C9-C10-C11) | Dihedral angle ( $\angle$ C10-C1-C2-C5) | Dihedral angle ( $\angle$ C8-C9-C10-C11) |
| Gas phase  | 1°                                      | 3°                                       | 10°                                     | 9°                                       |
| PCM (MeOH) | -4°                                     | 8°                                       | 10°                                     | 10°                                      |

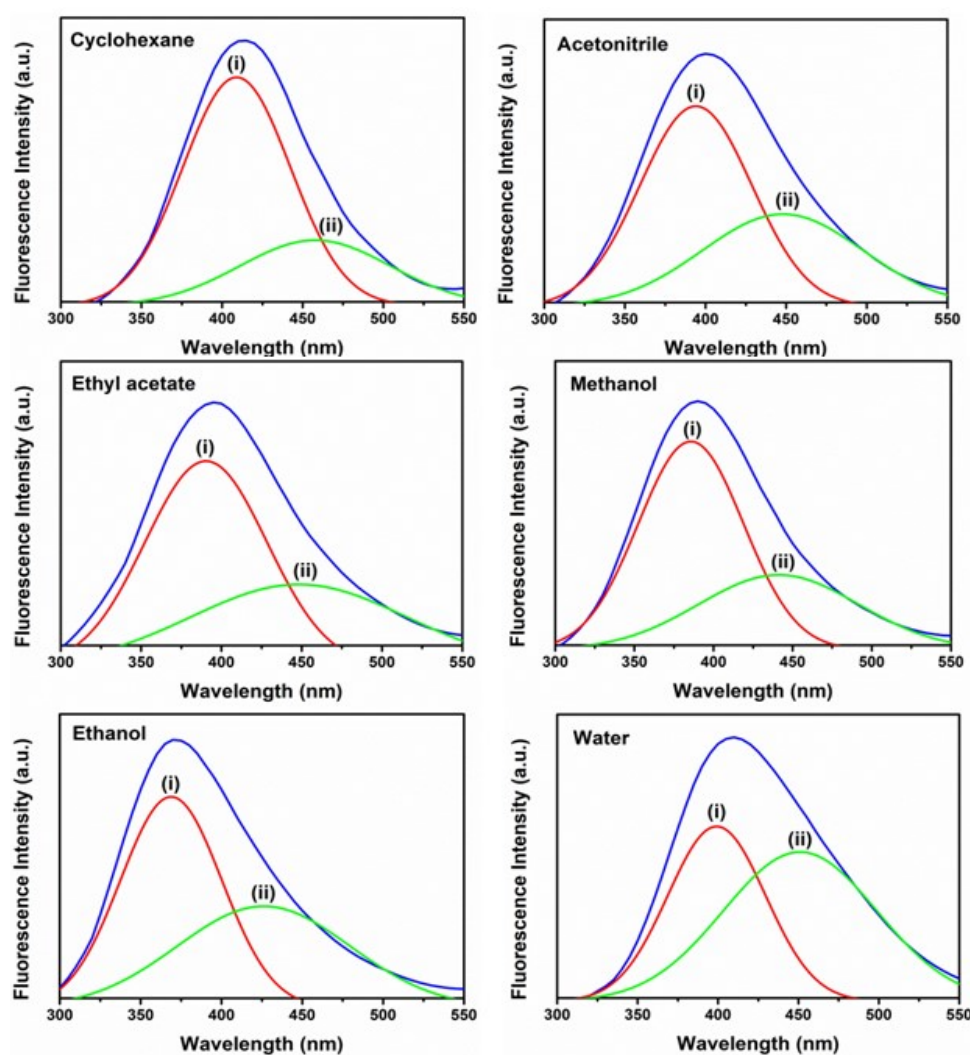

**Figure S3:** Deconvoluted fluorescence spectra of MPPS in solvents of different polarities.  $\lambda_{\text{ex}}$  for fluorescence measurements of MPPS in a particular solvent corresponds to a longer wavelength absorption peak maximum of MPPS (Given in Table 1).



**Table S3:** Fluorescence peak maxima of Deconvoluted bands of MPPS in solvents of different polarities.

| Solvent       | $\lambda_{short}$<br>(nm) | $\lambda_{long}$<br>(nm) |
|---------------|---------------------------|--------------------------|
| Cyclohexane   | 409                       | 460                      |
| Ethyl acetate | 390                       | 448                      |
| Ethanol       | 369                       | 426                      |
| Methanol      | 386                       | 442                      |
| Acetonitrile  | 394                       | 450                      |
| Water         | 399                       | 451                      |

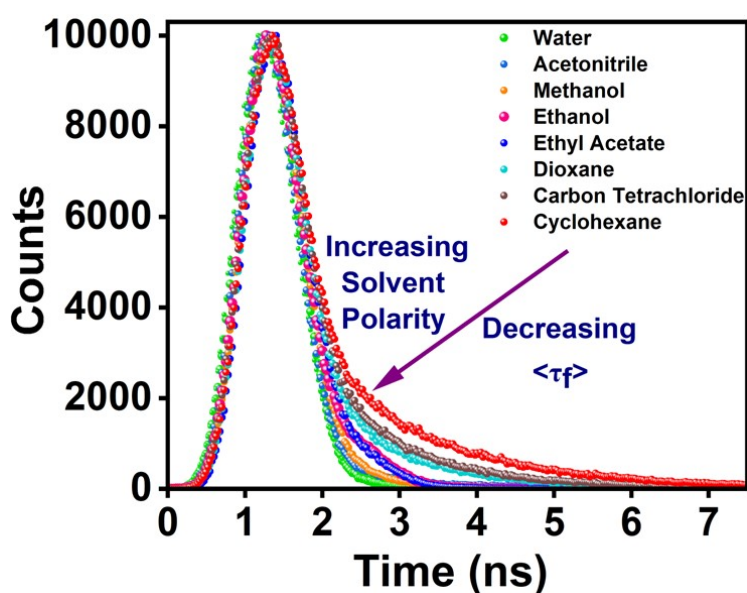

**Figure S4:** Fluorescence Intensity decays of MPPS in different solvents;  $\lambda_{ex} = 330$  nm, and  $\lambda_{em} = 395$  nm

**Note S1:**

#### Average lifetimes and radiative ( $k_r$ ) and non-radiative ( $k_{nr}$ ) rate constants of MPPS

The fluorescence intensity decays of MPPS in solvents of different polarities are bi-exponential in nature. The average lifetime values have been calculated using Equation S1<sup>81</sup>:

$$\langle \tau \rangle = a_1\tau_1 + a_2\tau_2 \quad (S1)$$

where  $\langle \tau \rangle$  represents the average lifetime,  $a_1$  and  $a_2$  denote the pre-exponential factors of the fast and the slow components, respectively, while  $\tau_1$  and  $\tau_2$  signify the corresponding lifetimes of the fast and the slow components, respectively.  $k_r$  and  $k_{nr}$  are calculated using Equations S2<sup>81</sup>

and S3<sup>81</sup>, respectively, using the values of fluorescence quantum yield ( $\phi_f$ ) and average lifetime ( $\langle\tau\rangle$ ) given in Table 1, and are tabulated in the same.

$$k_r = \phi_f / \langle\tau\rangle \quad (\text{S2})$$

$$k_{nr} = (1 / \langle\tau\rangle) - k_r \quad (\text{S3})$$

### **Modified Stern-Volmer equation and the calculation of the fraction of Trp residues accessible to MPPS ( $f_a$ ) and the Stern-Volmer constant ( $K_a$ )**

To quantify the fractional accessibility of Trp residues to MPPS in native BSA, and to calculate the values of the fraction of Trp residues accessible to MPPS ( $f_a$ ) and the Stern-Volmer constant ( $K_a$ ) for the quenching of accessible fractions in the native protein, the modified Stern-Volmer plot based on Equation S4<sup>81</sup> has been used:

$$\frac{F_o}{(F_o - F)} = \frac{1}{f_a K_a [\text{MPPS}]} + \frac{1}{f_a} \quad (\text{S4})$$

where  $F_o$  and  $F$  are the total fluorescence intensities of Trp residues in BSA in the absence and presence of MPPS at its concentration, [MPPS], respectively.  $K_a$  is the Stern-Volmer constant for the quenching of accessible fractions.  $f_a$  is the fraction of Trp residues accessible to MPPS.  $f_a$  can be written as (Equation S5<sup>81</sup>):

$$f_a = \frac{F_{0a}}{F_{0b} + F_{0a}} \quad (\text{S5})$$

where the subscript 0 refers to the fluorescence intensity in the absence of the quencher. Thus,  $F_{0a}$  denotes the fluorescence intensity from the accessible fraction, while  $F_{0b}$  refers to the fluorescence intensity from the inaccessible fraction in BSA without the quencher.

### **Binding constant ( $K'$ ) of MPPS and the number of binding sites ( $n$ )**

The binding constant ( $K'$ ) of MPPS and the number of binding sites ( $n$ ) for both native and denatured BSA have been calculated from the linear fitting of the data in Figures S8a and S8b based on Equation S6 (given below), respectively. For a static quenching mechanism with the assumption that the protein has the same and independent binding sites, the following

equation (Equation S6) can be used to determine the binding constant ( $K'$ ) and the number of binding sites ( $n$ ).<sup>94</sup>

$$\log[(F_0 - F)/F] = n \log K' - n \log(1/([MPPS] - (F_0 - F)[P]/F_0)) \quad (\text{S6})$$

where  $F_0$  and  $F$  are fluorescence intensities of BSA in the absence and presence of quencher at a concentration  $[MPPS]$ , respectively, and  $[P]$  is the total concentration of the protein.

### Fluorescence anisotropy decay, decay function, and rotational relaxation parameters

In this work, the time-resolved fluorescence anisotropy,  $r(t)$  measurements of MPPS have been carried out on the same TCSPC instrument using polarizers, and  $r(t)$  values have been calculated using Equation S7<sup>81</sup>:

$$r(t) = \frac{[I_{\parallel}(t) - GI_{\perp}(t)]}{[I_{\parallel}(t) + 2GI_{\perp}(t)]} \quad (\text{S7})$$

where  $G$  indicates the correction factor corresponding to detector sensitivity to the emission's polarization detection, and  $I_{\parallel}(t)$  and  $I_{\perp}(t)$  represent fluorescence decays polarized parallelly and perpendicularly to the excitation light polarization, respectively. The  $G$ -factor is  $\sim 0.6$  for our instrument. All anisotropy decays are found to be monoexponential, and the anisotropy decay function is described by Equation S8<sup>81</sup>:

$$r(t) = r_0 a_r \exp(-t/\tau_r) \quad (\text{S8})$$

where, limiting anisotropy,  $r_0$  which deals with the inherent depolarization of the probe molecule,  $\tau_r$  stands for rotational relaxation time for the rotational motion of the probe molecule, and  $a_r$  refers to a relative amplitude, where  $a_r = 1$  for a mono exponential anisotropy decay.

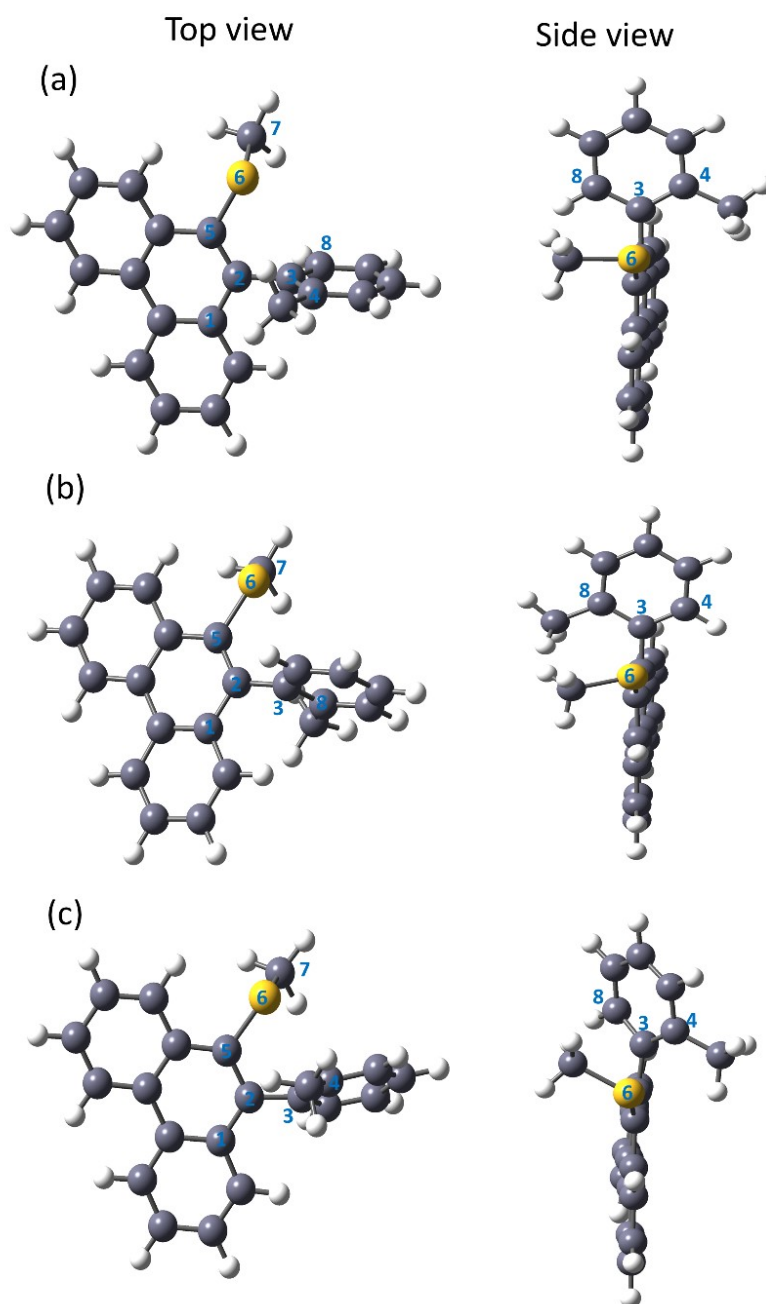

**Figure S5.** Optimized geometry of the molecule, MTPS : (a) ground state G-1, (b) ground state G-2, and (c) excited state (E-1) in the gas phase obtained at CAM-B3LYP/6-311++g(d,p) level of theory.

**Table S4.** Dihedral angles  $\angle C1-C2-C3-C4$  ( $\varphi_1$ ) and  $\angle C2-C5-C6-C7$  ( $\varphi_2$ ) of MTPS at the G-1, G-2, and E-1 in the gas phase and using PCM in CCl<sub>4</sub>, MOH, ACN, and Water solvents obtained using CAM-B3LYP/6-311++g(d,p) level.

| Medium |                  | $\angle C1-C2-C3-C4 (\varphi_1)$ |     |      | $\angle C2-C5-C6-C7 (\varphi_2)$ |      |     |
|--------|------------------|----------------------------------|-----|------|----------------------------------|------|-----|
|        |                  | G-1                              | G-2 | E-1  | G-1                              | G-2  | E-1 |
| Gas    |                  | 94°                              | 97° | 140° | 96°                              | 109° | 62° |
| PCM    | CCl <sub>4</sub> | 92°                              | 97° | 139° | 99°                              | 110° | 62° |
|        | ACN              | 91°                              | 96° | 74°  | 102°                             | 111° | 64° |
|        | MeOH             | 91°                              | 96° | 74°  | 102°                             | 111° | 64° |
|        | Water            | 90°                              | 96° | 74°  | 99°                              | 111° | 64° |

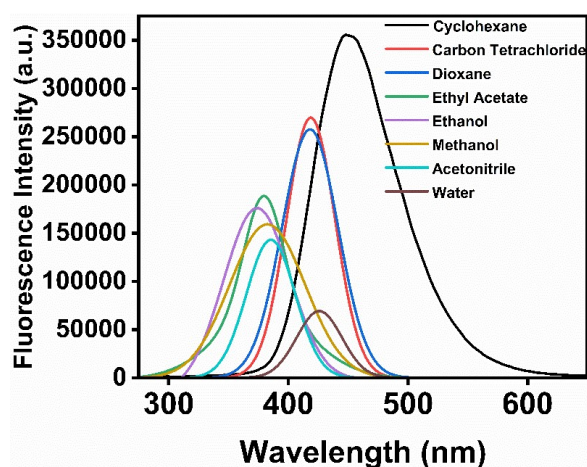

| Solvents             | $\epsilon$ | $\lambda_{ab}^{max}$ (nm) | $\lambda_{fl}^{max}$ (nm) | $\phi$ |
|----------------------|------------|---------------------------|---------------------------|--------|
| Cyclohexane          | 2.02       | 258, 315                  | 452                       | 0.2256 |
| Carbon Tetrachloride | 2.24       | 251, 313                  | 419                       | 0.2103 |
| Dioxane              | 2.25       | 257, 308                  | 417                       | 0.2036 |
| Ethyl Acetate        | 6.02       | 256, 307                  | 379                       | 0.1816 |
| Ethanol              | 24.55      | 258, 309                  | 373                       | 0.1656 |
| Methanol             | 32.66      | 252, 309                  | 381                       | 0.1403 |
| Acetonitrile         | 37.50      | 256, 306                  | 385                       | 0.1262 |
| Water                | 78.36      | 255, 307                  | 426                       | 0.1002 |

**Figure S6:** Fluorescence spectra of MTPS in the solvents of different polarities. (Table) Absorption peak maxima, fluorescence peak maxima and fluorescence quantum yields of MTPS in the solvents of different polarities.  $\lambda_{ex}$

for steady-state fluorescence and quantum yield measurements of MTPS in a particular solvent corresponds to a longer wavelength absorption peak maximum of MTPS.

**Table S5.** Theoretical excitation energies for G-1 and G-2 conformers and emission energies (E) of MTPS in the gas phase and using PCM in CCl<sub>4</sub>, ACN, MOH, and water solvent obtained using the TD-DFT method at the CAM-B3LYP/6-311++g(d,p) level

| Medium |                      | Excitation<br>(eV) |      | Emission<br>(eV) |
|--------|----------------------|--------------------|------|------------------|
|        |                      | G-1                | G-2  | E                |
| Gas    | S <sub>1</sub> State | 4.26               | 4.25 | 3.82             |
| PCM    | CCl <sub>4</sub>     | 4.26               | 4.25 | 3.82             |
|        | ACN                  | 4.27               | 4.26 | 3.71             |
|        | MOH                  | 4.27               | 4.26 | 3.71             |
|        | H <sub>2</sub> O     | 4.27               | 4.26 | 3.71             |

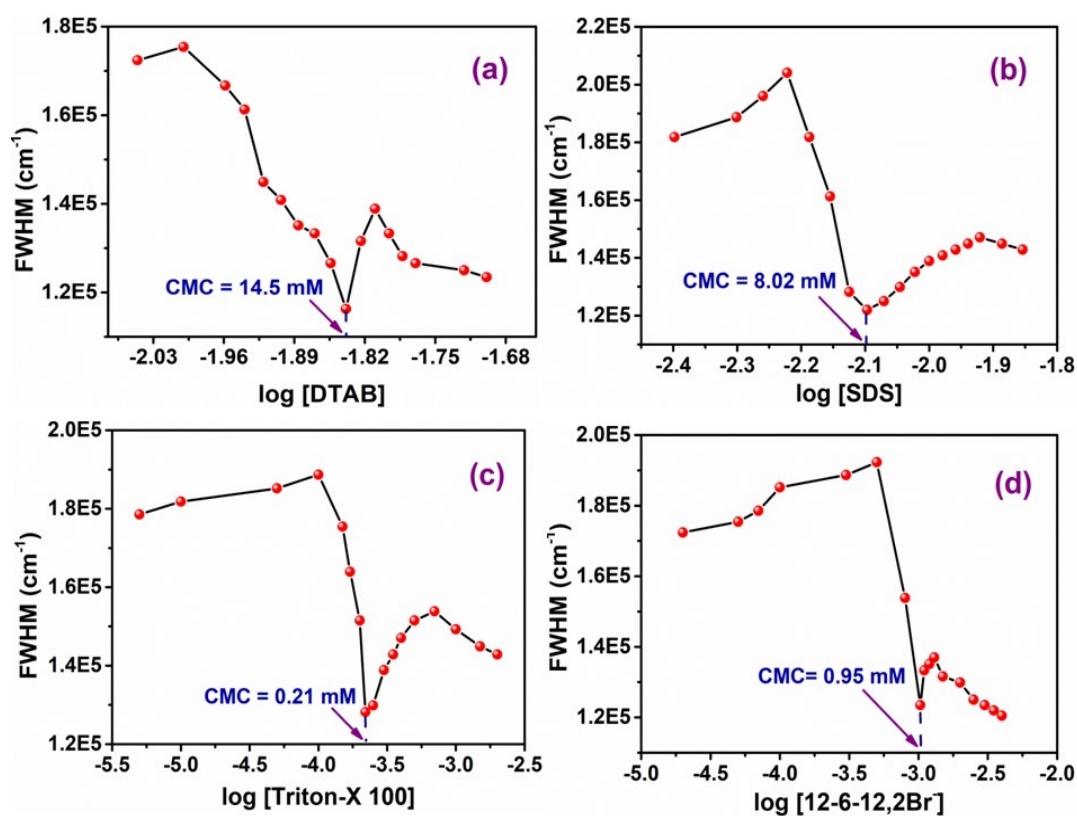

**Figure S7:** FWHM of fluorescence bands of MPPS versus concentrations of (a) DTAB, (b) SDS, (c) Triton-X 100, and (d) 12-6-12,2Br<sup>-</sup> surfactants. [MPPS] = 5  $\mu$ M,  $\lambda_{\text{ex}}$  = 330 nm.

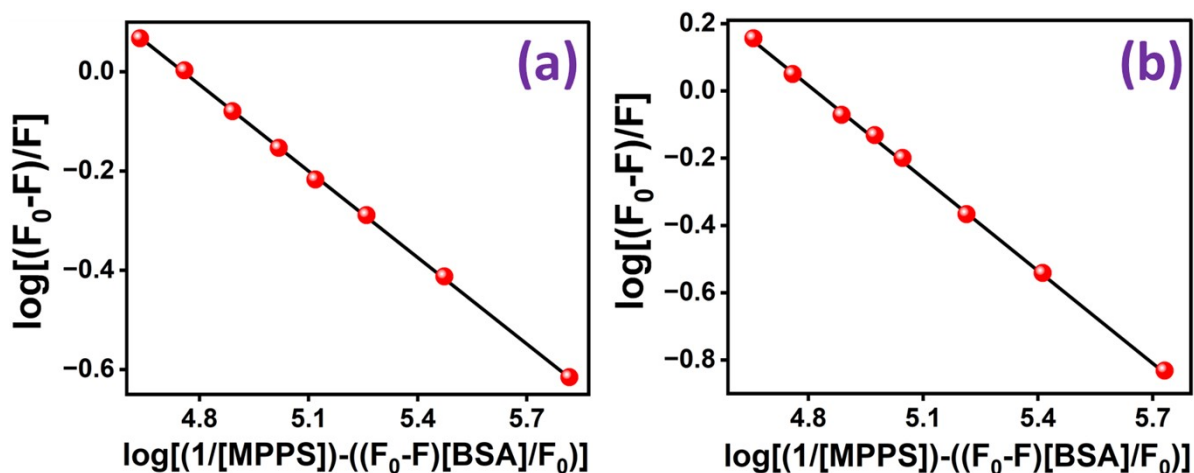

**Figure S8:** Plots of  $\log[(F_0 - F)/F]$  versus  $\log(1/([MPPS] - (F_0 - F)[BSA]/F_0))$  in the case of (a) native BSA, and (b) BSA + 0.3 mM 12-6-12,2Br.  $[BSA] = 5.0 \mu\text{M}$ .  $\lambda_{\text{ex}} = 295 \text{ nm}$ .  $\lambda_{\text{em}} = 337 \text{ nm}$ .

**Table S6:** % of various elements of secondary structures of BSA in the presence of different concentrations of 12-6-12,2Br.

| [12-6-12]<br>mM | $\alpha$ -Helix | $\beta$ -Sheet |          | $\beta$ -turn | Random coil |
|-----------------|-----------------|----------------|----------|---------------|-------------|
|                 |                 | Anti-parallel  | Parallel |               |             |
| 0               | 60.7            | 3.5            | 4.7      | 12.6          | 21.1        |
| 0.008           | 62.3            | 3.6            | 4.9      | 10.7          | 16.4        |
| 0.01            | 64.8            | 2.2            | 3.4      | 13.6          | 23.7        |
| 0.03            | 21.5            | 4.5            | 5.1      | 14.1          | 23.4        |
| 0.06            | 3.36            | 11.3           | 11.6     | 18.9          | 40.6        |
| 0.09            | 16.81           | 7.6            | 8.3      | 16.4          | 32.7        |
| 0.11            | 34.4            | 4.2            | 5.1      | 13.1          | 22.2        |
| 0.13            | 49.4            | 3.3            | 4.4      | 12.1          | 20.5        |
| 0.15            | 44.8            | 3.4            | 4.7      | 12.3          | 23.4        |
| 0.18            | 43.1            | 3.6            | 6.9      | 11.7          | 48.1        |
| 0.2             | 47.8            | 3.1            | 6.3      | 11.9          | 49.3        |
| 0.25            | 46.5            | 4.2            | 7.4      | 12.3          | 50.4        |
| 0.3             | 42.9            | 4.9            | 8.2      | 14.5          | 55.2        |
| 0.4             | 44.4            | 5.6            | 8.4      | 14.9          | 58.4        |
| 0.5             | 44.2            | 6.3            | 9.2      | 15.6          | 60.9        |
| 0.7             | 43.9            | 7.9            | 10.9     | 16.9          | 65.3        |
| 0.9             | 42.4            | 9.6            | 14.6     | 17.2          | 68.2        |
| 1.00            | 39.9            | 16.1           | 40.4     | 19.6          | 79.6        |
| 5.00            | 31.8            | 16.7           | 42.6     | 17.8          | 88.4        |

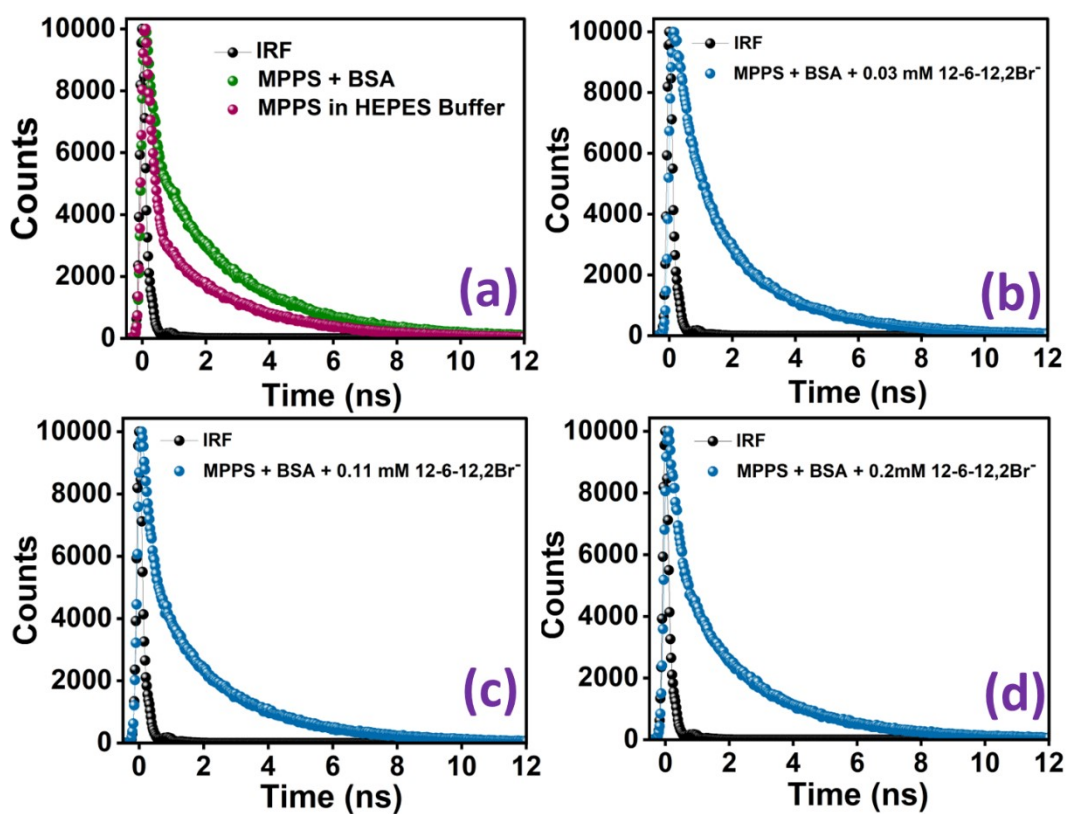

**Figure S9:** Fluorescence intensity decays of MPPS in (a) HEPES buffer, and HEPES buffer with 5.0  $\mu\text{M}$  BSA, (b) HEPES buffer with BSA and 0.03 mM 12-6-12,2Br<sup>-</sup> (non-cooperative), (c) HEPES buffer with BSA and 0.11 mM 12-6-12,2Br<sup>-</sup> (cooperative), and (d) HEPES buffer with BSA and 0.2 mM 12-6-12,2Br<sup>-</sup> (massive binding). [BSA] = 5.0  $\mu\text{M}$ , [HEPES buffer] = 10 mM, pH = 7.4;  $\lambda_{\text{ex}}$  = 330 nm,  $\lambda_{\text{em}}$  = 395 nm



**Table S7:** Excited singlet state lifetime values of MTPS in different systems of BSA with increasing concentrations of 12-6-12,2Br<sup>-</sup>. [MTPS] = 5.0 μM, [BSA] = 5.0 μM, λ<sub>ex</sub> = 330 nm, λ<sub>em</sub> = 365 nm

| [12-6-12,2Br <sup>-</sup> ]<br>(mM) | <i>a</i> <sub>1</sub> | τ <sub>1</sub> (ps) | <i>a</i> <sub>2</sub> | τ <sub>2</sub> (ps) | <τ <sub>f</sub> ><br>(ps) | χ <sup>2</sup> |
|-------------------------------------|-----------------------|---------------------|-----------------------|---------------------|---------------------------|----------------|
| 0.000                               | 0.64±0.04             | 2562± 690           | 0.36± 0.02            | 6130± 291           | 3853                      | 1.12           |
| 0.008                               | 0.77± 0.03            | 2159 ± 289          | 0.23± 0.03            | 5989± 512           | 3035                      | 1.05           |
| 0.010                               | 0.85± 0.03            | 1953± 209           | 0.15± 0.04            | 6133± 232           | 2579                      | 1.04           |
| 0.030                               | 0.88± 0.03            | 2004± 216           | 0.12± 0.03            | 6086± 294           | 2481                      | 1.16           |
| 0.050                               | 0.85± 0.03            | 1909± 277           | 0.15± 0.04            | 5736± 288           | 2466                      | 1.12           |
| 0.060                               | 0.96± 0.02            | 651± 202            | 0.04± 0.04            | 1655± 247           | 691                       | 1.06           |
| 0.011                               | 0.97± 0.02            | 716± 263            | 0.03± 0.02            | 3854± 206           | 825                       | 0.99           |
| 0.130                               | 0.96± 0.03            | 1378± 634           | 0.04± 0.04            | 3638± 299           | 1467                      | 0.98           |
| 0.150                               | 0.96± 0.03            | 718± 512            | 0.04± 0.03            | 3846± 297           | 840                       | 1.00           |
| 0.180                               | 0.94± 0.02            | 791± 403            | 0.06± 0.04            | 3004± 201           | 920                       | 1.09           |
| 0.200                               | 0.94± 0.02            | 781± 317            | 0.06± 0.03            | 2927± 577           | 910                       | 1.05           |
| 0.300                               | 0.95± 0.03            | 765± 202            | 0.05± 0.04            | 3897± 211           | 915                       | 1.19           |

**Table S8:** Cartesian coordinates of the optimized geometries of the MPPS and MPTS molecules obtained at the CAM-B3LYP level using 6-311++G(d,p) basis set.

| MPPS- G-1 (gas phase) |           |           |           |
|-----------------------|-----------|-----------|-----------|
| Atom                  | X         | Y         | Z         |
| C                     | 0.099573  | 3.830417  | 0.172044  |
| C                     | 0.677235  | 2.591027  | 0.057065  |
| C                     | -0.107892 | 1.420307  | -0.005786 |
| C                     | -1.514122 | 1.532887  | 0.044052  |
| C                     | -2.077809 | 2.817885  | 0.166144  |
| C                     | -1.293604 | 3.943383  | 0.229959  |
| C                     | 0.515178  | 0.116353  | -0.11367  |
| C                     | -2.3283   | 0.332279  | -0.041558 |
| C                     | -1.699703 | -0.925299 | -0.179373 |
| C                     | -0.25073  | -1.006152 | -0.192071 |
| C                     | -2.502681 | -2.077453 | -0.300039 |
| H                     | -2.015263 | -3.03236  | -0.439474 |
| C                     | -3.872415 | -2.001487 | -0.267442 |
| C                     | -4.496355 | -0.759163 | -0.113328 |
| C                     | -3.735955 | 0.378866  | -0.00782  |
| H                     | 0.720791  | 4.716713  | 0.217359  |
| H                     | 1.753921  | 2.503566  | 0.012013  |
| H                     | -3.151295 | 2.934894  | 0.208698  |
| H                     | -1.756755 | 4.91849   | 0.322276  |
| H                     | -4.46727  | -2.901526 | -0.366467 |
| H                     | -5.57725  | -0.691548 | -0.084615 |
| H                     | -4.241096 | 1.328144  | 0.100143  |
| C                     | 2.007306  | 0.045475  | -0.117066 |
| C                     | 2.712626  | 0.033701  | 1.083222  |
| C                     | 2.715968  | 0.022941  | -1.314824 |
| C                     | 4.099789  | -0.02018  | 1.086801  |
| H                     | 2.16942   | 0.067798  | 2.020875  |
| C                     | 4.102504  | -0.027507 | -1.313057 |
| H                     | 2.174691  | 0.036748  | -2.253616 |
| C                     | 4.798633  | -0.051934 | -0.112018 |
| H                     | 4.635423  | -0.035322 | 2.02874   |
| H                     | 4.640656  | -0.050929 | -2.253285 |
| H                     | 5.881269  | -0.093612 | -0.11056  |
| S                     | 0.541463  | -2.608296 | -0.336897 |
| C                     | 0.391875  | -3.19336  | 1.378759  |
| H                     | -0.649772 | -3.229418 | 1.69555   |
| H                     | 0.807562  | -4.200589 | 1.40177   |
| H                     | 0.964855  | -2.556229 | 2.050988  |

| MPPS- E-1 (gas phase) |           |           |           |
|-----------------------|-----------|-----------|-----------|
| Atom                  | X         | Y         | Z         |
| C                     | -0.735416 | 3.873937  | -0.032086 |
| C                     | 0.090398  | 2.778974  | -0.143093 |
| C                     | -0.400799 | 1.458293  | -0.038827 |
| C                     | -1.807933 | 1.278111  | 0.054023  |
| C                     | -2.61817  | 2.41242   | 0.184471  |
| C                     | -2.102432 | 3.693067  | 0.163915  |
| C                     | 0.471716  | 0.313366  | -0.104241 |
| C                     | -2.393003 | -0.068855 | -0.043173 |
| C                     | -1.541582 | -1.201462 | -0.122992 |
| C                     | -0.122332 | -0.993464 | -0.098996 |
| C                     | -2.131559 | -2.482537 | -0.194414 |
| H                     | -1.496996 | -3.358073 | -0.237115 |
| C                     | -3.497104 | -2.648163 | -0.216111 |
| C                     | -4.333875 | -1.535894 | -0.156647 |
| C                     | -3.776627 | -0.274464 | -0.070047 |
| H                     | -0.320162 | 4.871799  | -0.11019  |
| H                     | 1.140206  | 2.938807  | -0.337554 |
| H                     | -3.686876 | 2.297387  | 0.29633   |
| H                     | -2.762452 | 4.545378  | 0.268837  |
| H                     | -3.916337 | -3.64547  | -0.279342 |
| H                     | -5.410078 | -1.653983 | -0.175332 |
| H                     | -4.445521 | 0.573316  | -0.025192 |
| C                     | 1.899174  | 0.383575  | -0.257037 |
| C                     | 2.739729  | 1.251227  | 0.486371  |
| C                     | 2.553976  | -0.587682 | -1.082625 |
| C                     | 4.105079  | 1.102348  | 0.474747  |
| H                     | 2.294675  | 1.983299  | 1.146528  |
| C                     | 3.947865  | -0.716448 | -1.086219 |
| H                     | 1.984272  | -1.065944 | -1.868017 |
| C                     | 4.727769  | 0.104943  | -0.305145 |
| H                     | 4.713206  | 1.7478    | 1.098081  |
| H                     | 4.409065  | -1.44952  | -1.738302 |
| H                     | 5.806098  | 0.007096  | -0.30342  |
| S                     | 0.93118   | -2.350733 | 0.096366  |
| C                     | 1.764071  | -2.123682 | 1.704117  |
| H                     | 1.057478  | -2.407884 | 2.484245  |
| H                     | 2.627327  | -2.787604 | 1.714281  |
| H                     | 2.073543  | -1.090337 | 1.828371  |

| E-2 - MPPS (gas phase) |           |          |          |
|------------------------|-----------|----------|----------|
| Atom                   | X         | Y        | Z        |
| C                      | 0.028119  | 3.882681 | 0.363304 |
| C                      | 0.687959  | 2.685693 | 0.221092 |
| C                      | -0.009867 | 1.452549 | 0.125264 |
| C                      | -1.440853 | 1.506142 | 0.05155  |
| C                      | -2.074726 | 2.735299 | 0.24196  |

|   |           |           |           |
|---|-----------|-----------|-----------|
| C | -1.365618 | 3.910473  | 0.414037  |
| C | 0.653352  | 0.196135  | 0.001715  |
| C | -2.216457 | 0.305642  | -0.303683 |
| C | -1.567958 | -0.958024 | -0.288521 |
| C | -0.185694 | -0.98864  | 0.036075  |
| C | -2.315703 | -2.116866 | -0.578497 |
| H | -1.808615 | -3.074317 | -0.608872 |
| C | -3.659678 | -2.038989 | -0.884944 |
| C | -4.290755 | -0.799942 | -0.926033 |
| C | -3.567071 | 0.352322  | -0.645582 |
| H | 0.595624  | 4.802271  | 0.442623  |
| H | 1.765435  | 2.68602   | 0.168907  |
| H | -3.155324 | 2.781752  | 0.246005  |
| H | -1.892506 | 4.845049  | 0.562435  |
| H | -4.213999 | -2.940849 | -1.116849 |
| H | -5.339731 | -0.72795  | -1.185097 |
| H | -4.078171 | 1.304196  | -0.697954 |
| C | 2.086     | 0.016005  | -0.234265 |
| C | 3.091884  | 0.67255   | 0.49823   |
| C | 2.500853  | -0.894675 | -1.226115 |
| C | 4.431638  | 0.445403  | 0.23522   |
| H | 2.818923  | 1.319816  | 1.321015  |
| C | 3.841229  | -1.107607 | -1.492588 |
| H | 1.746876  | -1.413598 | -1.806589 |
| C | 4.81962   | -0.438987 | -0.764983 |
| H | 5.183309  | 0.952098  | 0.829699  |
| H | 4.125914  | -1.799392 | -2.27698  |
| H | 5.869422  | -0.61195  | -0.96749  |
| S | 0.536825  | -2.270172 | 0.952178  |
| C | -0.690616 | -2.715775 | 2.223958  |
| H | -1.604193 | -3.10668  | 1.784494  |
| H | -0.221425 | -3.473642 | 2.85074   |
| H | -0.914701 | -1.828406 | 2.815888  |

| G-1 - MPPS PCM (ACN) |           |           |           |
|----------------------|-----------|-----------|-----------|
| Atom                 | X         | Y         | Z         |
| C                    | 0.128246  | 3.830439  | 0.208671  |
| C                    | 0.698326  | 2.587251  | 0.087016  |
| C                    | -0.094473 | 1.42209   | 0.006899  |
| C                    | -1.5005   | 1.54446   | 0.04997   |
| C                    | -2.057562 | 2.832686  | 0.177298  |
| C                    | -1.265393 | 3.95279   | 0.255655  |
| C                    | 0.520923  | 0.114324  | -0.105788 |
| C                    | -2.322778 | 0.349291  | -0.044813 |
| C                    | -1.701867 | -0.913099 | -0.180589 |
| C                    | -0.25268  | -1.002836 | -0.187844 |
| C                    | -2.513804 | -2.059225 | -0.306306 |
| H                    | -2.038111 | -3.021155 | -0.436582 |
| C                    | -3.883957 | -1.972776 | -0.283448 |
| C                    | -4.499744 | -0.725061 | -0.133407 |
| C                    | -3.730982 | 0.407742  | -0.020876 |
| H                    | 0.755015  | 4.711882  | 0.268572  |
| H                    | 1.774966  | 2.494502  | 0.052377  |
| H                    | -3.130252 | 2.958132  | 0.213921  |
| H                    | -1.722477 | 4.930157  | 0.352585  |
| H                    | -4.484868 | -2.868454 | -0.384393 |
| H                    | -5.580125 | -0.649136 | -0.111841 |
| H                    | -4.230734 | 1.360078  | 0.085311  |
| C                    | 2.013007  | 0.037347  | -0.113143 |
| C                    | 2.719342  | -0.057933 | 1.083372  |
| C                    | 2.719306  | 0.093449  | -1.312105 |
| C                    | 4.107104  | -0.116263 | 1.080393  |
| H                    | 2.179345  | -0.089847 | 2.022812  |
| C                    | 4.10689   | 0.037066  | -1.316483 |
| H                    | 2.178505  | 0.175898  | -2.247939 |
| C                    | 4.804819  | -0.070215 | -0.119961 |
| H                    | 4.643797  | -0.196693 | 2.018346  |
| H                    | 4.643546  | 0.076549  | -2.25707  |
| H                    | 5.887351  | -0.114838 | -0.12288  |
| S                    | 0.528703  | -2.60965  | -0.34256  |
| C                    | 0.310187  | -3.257866 | 1.343631  |
| H                    | -0.743767 | -3.323355 | 1.608466  |
| H                    | 0.743042  | -4.257683 | 1.348631  |
| H                    | 0.83906   | -2.633622 | 2.0618    |

| E-1 - MPPS PCM (ACN) |           |           |           |
|----------------------|-----------|-----------|-----------|
| Atom                 | X         | Y         | Z         |
| C                    | -0.461692 | 3.863713  | 0.10336   |
| C                    | 0.293864  | 2.722538  | -0.034311 |
| C                    | -0.282123 | 1.4235    | 0.04175   |
| C                    | -1.710444 | 1.347179  | 0.088264  |
| C                    | -2.442948 | 2.52058   | 0.257746  |
| C                    | -1.839623 | 3.76957   | 0.292637  |
| C                    | 0.496921  | 0.231882  | -0.001108 |
| C                    | -2.384552 | 0.052352  | -0.117568 |
| C                    | -1.615558 | -1.14535  | -0.090158 |
| C                    | -0.202599 | -1.052957 | 0.090585  |
| C                    | -2.301488 | -2.379412 | -0.21075  |
| H                    | -1.742331 | -3.303642 | -0.1563   |
| C                    | -3.665647 | -2.432102 | -0.402698 |
| C                    | -4.406487 | -1.255778 | -0.473483 |
| C                    | -3.75934  | -0.035048 | -0.326765 |
| H                    | 0.019209  | 4.833651  | 0.058251  |
| H                    | 1.353306  | 2.824112  | -0.209691 |
| H                    | -3.518909 | 2.471967  | 0.352703  |
| H                    | -2.44157  | 4.659435  | 0.429123  |
| H                    | -4.155592 | -3.393605 | -0.501613 |
| H                    | -5.476928 | -1.28564  | -0.634368 |
| H                    | -4.354731 | 0.866158  | -0.377223 |
| C                    | 1.925741  | 0.225194  | -0.240672 |
| C                    | 2.830084  | 1.066949  | 0.453447  |
| C                    | 2.489327  | -0.702405 | -1.154525 |
| C                    | 4.190104  | 0.977764  | 0.254128  |
| H                    | 2.453655  | 1.740474  | 1.211582  |
| C                    | 3.861958  | -0.770562 | -1.35968  |
| H                    | 1.83424   | -1.303856 | -1.768268 |
| C                    | 4.721992  | 0.060039  | -0.660733 |
| H                    | 4.854477  | 1.611521  | 0.829988  |
| H                    | 4.255155  | -1.474868 | -2.083631 |
| H                    | 5.792313  | 0.00103   | -0.815792 |
| S                    | 0.685501  | -2.500675 | 0.416514  |
| C                    | 1.684685  | -2.143929 | 1.898166  |
| H                    | 1.012941  | -2.014917 | 2.746089  |
| H                    | 2.311765  | -3.021176 | 2.048979  |
| H                    | 2.301945  | -1.262161 | 1.760145  |

| E-2 - MPPS PCM (ACN) |           |           |           |
|----------------------|-----------|-----------|-----------|
| Atom                 | X         | Y         | Z         |
| C                    | 0.044949  | 3.915634  | 0.352172  |
| C                    | 0.701999  | 2.718435  | 0.191505  |
| C                    | 0.001764  | 1.479437  | 0.13079   |
| C                    | -1.433514 | 1.539907  | 0.09085   |
| C                    | -2.061973 | 2.764925  | 0.296863  |
| C                    | -1.346532 | 3.944445  | 0.449199  |
| C                    | 0.650436  | 0.222187  | 0.024259  |
| C                    | -2.213451 | 0.338808  | -0.26757  |
| C                    | -1.570841 | -0.930706 | -0.243518 |
| C                    | -0.198562 | -0.969797 | 0.110241  |
| C                    | -2.321913 | -2.082124 | -0.566577 |
| H                    | -1.826746 | -3.043742 | -0.601192 |
| C                    | -3.660074 | -1.991325 | -0.897087 |
| C                    | -4.284445 | -0.74901  | -0.930878 |
| C                    | -3.555515 | 0.398843  | -0.628321 |
| H                    | 0.614768  | 4.835439  | 0.410249  |
| H                    | 1.777347  | 2.724718  | 0.108056  |
| H                    | -3.14234  | 2.813324  | 0.324841  |
| H                    | -1.869212 | 4.87884   | 0.612239  |
| H                    | -4.213932 | -2.88761  | -1.150418 |
| H                    | -5.329462 | -0.667048 | -1.202908 |
| H                    | -4.060514 | 1.35415   | -0.679503 |
| C                    | 2.076207  | 0.026984  | -0.214317 |
| C                    | 3.091186  | 0.720195  | 0.476931  |
| C                    | 2.487884  | -0.929244 | -1.168975 |
| C                    | 4.428881  | 0.487227  | 0.208901  |
| H                    | 2.828497  | 1.401934  | 1.274314  |
| C                    | 3.826896  | -1.145601 | -1.442389 |
| H                    | 1.735206  | -1.479869 | -1.720443 |
| C                    | 4.810986  | -0.438694 | -0.75782  |
| H                    | 5.183882  | 1.023135  | 0.772666  |
| H                    | 4.10579   | -1.87086  | -2.198074 |
| H                    | 5.85938   | -0.614282 | -0.965694 |
| S                    | 0.549764  | -2.283163 | 0.948151  |
| C                    | -0.734737 | -3.045657 | 1.988236  |
| H                    | -1.313095 | -3.788209 | 1.446317  |
| H                    | -0.194294 | -3.528191 | 2.801451  |
| H                    | -1.389281 | -2.270336 | 2.382722  |

|                       |  |
|-----------------------|--|
| G-1 - MPPS PCM (CCL4) |  |
|-----------------------|--|

| Atom | X         | Y         | Z         |
|------|-----------|-----------|-----------|
| C    | 0.111568  | 3.830265  | 0.191285  |
| C    | 0.686107  | 2.589268  | 0.073802  |
| C    | -0.102265 | 1.420955  | 0.002109  |
| C    | -1.508445 | 1.537739  | 0.048012  |
| C    | -2.069425 | 2.824086  | 0.1719    |
| C    | -1.281902 | 3.9473    | 0.242804  |
| C    | 0.517642  | 0.115473  | -0.108363 |
| C    | -2.32598  | 0.339466  | -0.042347 |
| C    | -1.700519 | -0.920023 | -0.179579 |
| C    | -0.251434 | -1.004811 | -0.189121 |
| C    | -2.507302 | -2.069396 | -0.30434  |
| H    | -2.024605 | -3.026968 | -0.441366 |
| C    | -3.877255 | -1.989008 | -0.276854 |
| C    | -4.497876 | -0.744542 | -0.123605 |
| C    | -3.733913 | 0.391114  | -0.01369  |
| H    | 0.735184  | 4.714472  | 0.243704  |
| H    | 1.762827  | 2.499467  | 0.034359  |
| H    | -3.142657 | 2.944513  | 0.210678  |
| H    | -1.742527 | 4.923435  | 0.336437  |
| H    | -4.474639 | -2.887047 | -0.378589 |
| H    | -5.578604 | -0.67342  | -0.098792 |
| H    | -4.236627 | 1.341763  | 0.093594  |
| C    | 2.009812  | 0.042247  | -0.114584 |
| C    | 2.716573  | -0.014591 | 1.083717  |
| C    | 2.716247  | 0.063075  | -1.31398  |
| C    | 4.103957  | -0.070059 | 1.082858  |
| H    | 2.175452  | -0.016307 | 2.023126  |
| C    | 4.103213  | 0.010319  | -1.316444 |
| H    | 2.17409   | 0.113263  | -2.251143 |
| C    | 4.801197  | -0.058997 | -0.11781  |
| H    | 4.640944  | -0.120574 | 2.022783  |
| H    | 4.639789  | 0.020772  | -2.257826 |
| H    | 5.883795  | -0.102251 | -0.119529 |
| S    | 0.536521  | -2.608427 | -0.340663 |
| C    | 0.357013  | -3.223611 | 1.361867  |
| H    | -0.690073 | -3.270402 | 1.657771  |
| H    | 0.777658  | -4.22879  | 1.374601  |
| H    | 0.913592  | -2.594705 | 2.054975  |

| E-1 - MPPS PCM (CCL4) |           |           |           |
|-----------------------|-----------|-----------|-----------|
| Atom                  | X         | Y         | Z         |
| C                     | -0.678323 | 3.875292  | -0.010907 |
| C                     | 0.132679  | 2.768643  | -0.119195 |
| C                     | -0.377401 | 1.45288   | -0.021022 |
| C                     | -1.789685 | 1.295237  | 0.056899  |
| C                     | -2.584184 | 2.439888  | 0.185932  |
| C                     | -2.049496 | 3.714302  | 0.174852  |
| C                     | 0.477723  | 0.296699  | -0.079721 |
| C                     | -2.394871 | -0.042543 | -0.055153 |
| C                     | -1.558386 | -1.189052 | -0.112562 |
| C                     | -0.13791  | -1.006763 | -0.0635   |
| C                     | -2.169403 | -2.461937 | -0.183447 |
| H                     | -1.548472 | -3.347954 | -0.199876 |
| C                     | -3.537262 | -2.604932 | -0.234827 |
| C                     | -4.356868 | -1.478555 | -0.204373 |
| C                     | -3.780101 | -0.224577 | -0.112334 |
| H                     | -0.247529 | 4.867074  | -0.082262 |
| H                     | 1.186123  | 2.915349  | -0.302922 |
| H                     | -3.655448 | 2.340255  | 0.28864   |
| H                     | -2.697857 | 4.575665  | 0.27866   |
| H                     | -3.971404 | -3.595925 | -0.297498 |
| H                     | -5.434249 | -1.578734 | -0.247227 |
| H                     | -4.435989 | 0.634208  | -0.086991 |
| C                     | 1.90557   | 0.353762  | -0.245717 |
| C                     | 2.754573  | 1.215364  | 0.496881  |
| C                     | 2.549541  | -0.601948 | -1.093331 |
| C                     | 4.120807  | 1.081569  | 0.452889  |
| H                     | 2.317328  | 1.930205  | 1.180784  |
| C                     | 3.942106  | -0.715994 | -1.131571 |
| H                     | 1.964169  | -1.102604 | -1.851958 |
| C                     | 4.733313  | 0.104978  | -0.358717 |
| H                     | 4.736385  | 1.721579  | 1.07446   |
| H                     | 4.394916  | -1.438662 | -1.80074  |
| H                     | 5.81237   | 0.01784   | -0.384756 |
| S                     | 0.885546  | -2.386834 | 0.125825  |
| C                     | 1.745966  | -2.162621 | 1.718377  |
| H                     | 1.045469  | -2.423313 | 2.511908  |
| H                     | 2.592491  | -2.847435 | 1.720769  |
| H                     | 2.082631  | -1.13637  | 1.829103  |

| E-2 - MPPS PCM (CCL <sub>4</sub> ) |   |   |   |
|------------------------------------|---|---|---|
| Atom                               | X | Y | Z |

|   |           |           |           |
|---|-----------|-----------|-----------|
| C | 0.027783  | 3.90173   | 0.356417  |
| C | 0.688833  | 2.706523  | 0.203443  |
| C | -0.007288 | 1.468731  | 0.127599  |
| C | -1.440665 | 1.52164   | 0.074144  |
| C | -2.074619 | 2.747249  | 0.273876  |
| C | -1.365022 | 3.926117  | 0.434317  |
| C | 0.651714  | 0.213695  | 0.011876  |
| C | -2.215798 | 0.3196    | -0.283193 |
| C | -1.566393 | -0.945049 | -0.265469 |
| C | -0.189912 | -0.975971 | 0.076269  |
| C | -2.311068 | -2.101707 | -0.577854 |
| H | -1.804556 | -3.058362 | -0.616425 |
| C | -3.652105 | -2.020979 | -0.896921 |
| C | -4.284466 | -0.782416 | -0.929463 |
| C | -3.562277 | 0.369343  | -0.634438 |
| H | 0.59411   | 4.8231    | 0.422575  |
| H | 1.765048  | 2.711959  | 0.130746  |
| H | -3.155286 | 2.791597  | 0.292571  |
| H | -1.891806 | 4.859291  | 0.591413  |
| H | -4.202856 | -2.92074  | -1.144932 |
| H | -5.331653 | -0.708404 | -1.195283 |
| H | -4.072978 | 1.321587  | -0.684413 |
| C | 2.080331  | 0.027234  | -0.225319 |
| C | 3.090595  | 0.706328  | 0.48354   |
| C | 2.494032  | -0.911643 | -1.193776 |
| C | 4.429095  | 0.474916  | 0.219539  |
| H | 2.822246  | 1.373997  | 1.2911    |
| C | 3.833674  | -1.127161 | -1.462466 |
| H | 1.740792  | -1.449436 | -1.757403 |
| C | 4.814537  | -0.435378 | -0.759517 |
| H | 5.182463  | 0.998803  | 0.796729  |
| H | 4.115669  | -1.839885 | -2.22888  |
| H | 5.863751  | -0.610625 | -0.963346 |
| S | 0.5498    | -2.276913 | 0.945993  |
| C | -0.709706 | -2.888522 | 2.111371  |
| H | -1.483626 | -3.467988 | 1.61658   |
| H | -0.172007 | -3.519666 | 2.818122  |
| H | -1.153771 | -2.040297 | 2.63111   |

| G-1 - MPPS PCM (MeOH) |           |           |           |
|-----------------------|-----------|-----------|-----------|
| Atom                  | X         | Y         | Z         |
| C                     | 0.128164  | 3.830419  | 0.20864   |
| C                     | 0.698263  | 2.587244  | 0.086991  |
| C                     | -0.094516 | 1.422072  | 0.006892  |
| C                     | -1.500542 | 1.544415  | 0.049977  |
| C                     | -2.057618 | 2.832631  | 0.177302  |
| C                     | -1.265472 | 3.952747  | 0.255638  |
| C                     | 0.520899  | 0.114318  | -0.105802 |
| C                     | -2.322797 | 0.349234  | -0.0448   |
| C                     | -1.701866 | -0.913138 | -0.180606 |
| C                     | -0.252681 | -1.002856 | -0.187868 |
| C                     | -2.513776 | -2.059275 | -0.30635  |
| H                     | -2.038034 | -3.021171 | -0.436711 |
| C                     | -3.883926 | -1.972857 | -0.283464 |
| C                     | -4.499736 | -0.725164 | -0.133371 |
| C                     | -3.730997 | 0.407649  | -0.020833 |
| H                     | 0.754921  | 4.711873  | 0.26852   |
| H                     | 1.774902  | 2.4945    | 0.052333  |
| H                     | -3.130312 | 2.958051  | 0.213924  |
| H                     | -1.722572 | 4.930109  | 0.352558  |
| H                     | -4.484822 | -2.868543 | -0.38445  |
| H                     | -5.580119 | -0.649263 | -0.111789 |
| H                     | -4.230759 | 1.359977  | 0.085377  |
| C                     | 2.012984  | 0.037359  | -0.113158 |
| C                     | 2.71933   | -0.057873 | 1.08335   |
| C                     | 2.719276  | 0.093439  | -1.312119 |
| C                     | 4.107087  | -0.116177 | 1.080368  |
| H                     | 2.179329  | -0.089751 | 2.02279   |
| C                     | 4.106854  | 0.037092  | -1.316501 |
| H                     | 2.178458  | 0.175826  | -2.247946 |
| C                     | 4.804792  | -0.070142 | -0.119985 |
| H                     | 4.643789  | -0.196578 | 2.018319  |
| H                     | 4.643504  | 0.076539  | -2.257093 |
| H                     | 5.887324  | -0.114756 | -0.122911 |
| S                     | 0.52874   | -2.609654 | -0.342551 |
| C                     | 0.310478  | -3.257585 | 1.343775  |
| H                     | -0.743431 | -3.322841 | 1.60886   |
| H                     | 0.743159  | -4.257479 | 1.34884   |
| H                     | 0.839624  | -2.633346 | 2.06175   |

| E-1 - MPPS PCM (MeOH) |           |          |          |
|-----------------------|-----------|----------|----------|
| Atom                  | X         | Y        | Z        |
| C                     | -0.462637 | 3.863876 | 0.102198 |

|   |           |           |           |
|---|-----------|-----------|-----------|
| C | 0.293077  | 2.722747  | -0.035139 |
| C | -0.28269  | 1.423717  | 0.041156  |
| C | -1.710909 | 1.347087  | 0.087827  |
| C | -2.443619 | 2.520489  | 0.256895  |
| C | -1.840543 | 3.769563  | 0.29138   |
| C | 0.496772  | 0.232196  | -0.001673 |
| C | -2.384787 | 0.051995  | -0.116968 |
| Z | -1.61544  | -1.145485 | -0.089999 |
| C | -0.202297 | -1.052759 | 0.089147  |
| C | -2.301162 | -2.379772 | -0.209453 |
| H | -1.74169  | -3.30381  | -0.15491  |
| C | -3.665416 | -2.432943 | -0.400271 |
| C | -4.406672 | -1.256835 | -0.470838 |
| C | -3.759776 | -0.035946 | -0.324963 |
| H | 0.01814   | 4.833866  | 0.056857  |
| H | 1.352509  | 2.824418  | -0.210561 |
| H | -3.519556 | 2.471754  | 0.351944  |
| H | -2.442661 | 4.659365  | 0.427528  |
| H | -4.155169 | -3.394627 | -0.498384 |
| H | -5.477235 | -1.287064 | -0.630842 |
| H | -4.355484 | 0.865055  | -0.375187 |
| C | 1.925667  | 0.226022  | -0.240343 |
| C | 2.829317  | 1.067743  | 0.454808  |
| C | 2.490263  | -0.701353 | -1.153896 |
| C | 4.189502  | 0.978483  | 0.257045  |
| H | 2.452016  | 1.741212  | 1.212563  |
| C | 3.863206  | -0.769601 | -1.357416 |
| H | 1.83586   | -1.301951 | -1.76918  |
| C | 4.72243   | 0.060748  | -0.657331 |
| H | 4.85327   | 1.612098  | 0.833759  |
| H | 4.257184  | -1.473703 | -2.081141 |
| H | 5.792926  | 0.001733  | -0.811181 |
| S | 0.687     | -2.500384 | 0.412155  |
| C | 1.684507  | -2.146078 | 1.895546  |
| H | 1.011885  | -2.023749 | 2.743778  |
| H | 2.315633  | -3.021024 | 2.042736  |
| H | 2.29761   | -1.260789 | 1.761466  |

| E-2 - MPPS PCM (MeOH) |           |           |           |
|-----------------------|-----------|-----------|-----------|
| Atom                  | X         | Y         | Z         |
| C                     | 0.041921  | 3.915639  | 0.352995  |
| C                     | 0.699908  | 2.719069  | 0.191261  |
| C                     | 0.000576  | 1.479626  | 0.130201  |
| C                     | -1.434763 | 1.539012  | 0.090409  |
| C                     | -2.064211 | 2.763373  | 0.29741   |
| C                     | -1.349568 | 3.943297  | 0.450532  |
| C                     | 0.650104  | 0.222944  | 0.023581  |
| C                     | -2.213728 | 0.337304  | -0.268375 |
| C                     | -1.570246 | -0.931778 | -0.242794 |
| C                     | -0.198027 | -0.969476 | 0.110775  |
| C                     | -2.320245 | -2.084025 | -0.565082 |
| H                     | -1.824229 | -3.045271 | -0.598055 |
| C                     | -3.657998 | -1.994316 | -0.89748  |
| C                     | -4.283096 | -0.752355 | -0.933515 |
| C                     | -3.555349 | 0.396278  | -0.630874 |
| H                     | 0.611031  | 4.835852  | 0.411381  |
| H                     | 1.775249  | 2.726088  | 0.107217  |
| H                     | -3.14462  | 2.810823  | 0.325746  |
| H                     | -1.872823 | 4.877191  | 0.614533  |
| H                     | -4.211055 | -2.891168 | -1.150464 |
| H                     | -5.327818 | -0.671336 | -1.206928 |
| H                     | -4.060539 | 1.351385  | -0.683394 |
| C                     | 2.075956  | 0.028402  | -0.215321 |
| C                     | 3.090873  | 0.722052  | 0.47546   |
| C                     | 2.487475  | -0.928063 | -1.169865 |
| C                     | 4.428552  | 0.488641  | 0.207648  |
| H                     | 2.828104  | 1.404269  | 1.272402  |
| C                     | 3.826429  | -1.144835 | -1.443044 |
| H                     | 1.734739  | -1.47874  | -1.721166 |
| C                     | 4.810527  | -0.437947 | -0.758505 |
| H                     | 5.183682  | 1.024623  | 0.771145  |
| H                     | 4.105296  | -1.870484 | -2.198367 |
| H                     | 5.858894  | -0.614052 | -0.966037 |
| S                     | 0.551714  | -2.281801 | 0.949152  |
| C                     | -0.731354 | -3.042083 | 1.992764  |
| H                     | -1.311756 | -3.784727 | 1.453121  |
| H                     | -0.189622 | -3.524366 | 2.805271  |
| H                     | -1.384365 | -2.265829 | 2.388077  |

|                        |  |  |  |
|------------------------|--|--|--|
| G-1 - MPPS PCM (Water) |  |  |  |
|------------------------|--|--|--|

| Atom | X         | Y         | Z         |
|------|-----------|-----------|-----------|
| C    | 0.128716  | 3.830565  | 0.208771  |
| C    | 0.698692  | 2.587304  | 0.087092  |
| C    | -0.094218 | 1.422202  | 0.006911  |
| C    | -1.500253 | 1.544723  | 0.049917  |
| C    | -2.057239 | 2.833008  | 0.177256  |
| C    | -1.264937 | 3.953047  | 0.255698  |
| C    | 0.521061  | 0.114362  | -0.105721 |
| C    | -2.322668 | 0.349621  | -0.044887 |
| C    | -1.701871 | -0.912873 | -0.180483 |
| C    | -0.252673 | -1.002717 | -0.187703 |
| C    | -2.513959 | -2.058935 | -0.306031 |
| H    | -2.038554 | -3.02107  | -0.435799 |
| C    | -3.884129 | -1.97231  | -0.283333 |
| C    | -4.499786 | -0.724472 | -0.133594 |
| C    | -3.730891 | 0.408283  | -0.021116 |
| H    | 0.755551  | 4.711948  | 0.268774  |
| H    | 1.775332  | 2.494528  | 0.052547  |
| H    | -3.129905 | 2.958599  | 0.213892  |
| H    | -1.721931 | 4.930442  | 0.352688  |
| H    | -4.485131 | -2.867948 | -0.384026 |
| H    | -5.580152 | -0.648412 | -0.112116 |
| H    | -4.230586 | 1.360663  | 0.084932  |
| C    | 2.013141  | 0.037282  | -0.113059 |
| C    | 2.719414  | -0.058072 | 1.083517  |
| C    | 2.719487  | 0.093302  | -1.312036 |
| C    | 4.107201  | -0.116562 | 1.080571  |
| H    | 2.179441  | -0.090027 | 2.022963  |
| C    | 4.107101  | 0.036703  | -1.316379 |
| H    | 2.178793  | 0.175957  | -2.247921 |
| C    | 4.804982  | -0.070652 | -0.119797 |
| H    | 4.643841  | -0.196999 | 2.018549  |
| H    | 4.643801  | 0.076234  | -2.256938 |
| H    | 5.88751   | -0.115332 | -0.122665 |
| S    | 0.528491  | -2.609626 | -0.342574 |
| C    | 0.308463  | -3.259496 | 1.342828  |
| H    | -0.745752 | -3.326397 | 1.606159  |
| H    | 0.742387  | -4.25884  | 1.347471  |
| H    | 0.835684  | -2.635193 | 2.062137  |

| E-1 - MPPS PCM (Water) |           |           |           |
|------------------------|-----------|-----------|-----------|
| Atom                   | X         | Y         | Z         |
| C                      | -0.457339 | 3.862758  | 0.112448  |
| C                      | 0.297822  | 2.721738  | -0.027857 |
| C                      | -0.278891 | 1.42235   | 0.046048  |
| C                      | -1.707875 | 1.347359  | 0.090916  |
| C                      | -2.439653 | 2.520262  | 0.263975  |
| C                      | -1.835341 | 3.768994  | 0.302346  |
| C                      | 0.497758  | 0.230299  | 0.003302  |
| C                      | -2.382698 | 0.054032  | -0.122612 |
| C                      | -1.615717 | -1.14485  | -0.089785 |
| C                      | -0.20438  | -1.0539   | 0.102113  |
| C                      | -2.30232  | -2.37789  | -0.216639 |
| H                      | -1.744907 | -3.303052 | -0.159916 |
| C                      | -3.665365 | -2.428182 | -0.418656 |
| C                      | -4.403598 | -1.250725 | -0.494879 |
| C                      | -3.755592 | -0.030633 | -0.343005 |
| H                      | 0.024     | 4.832572  | 0.06958   |
| H                      | 1.357299  | 2.823472  | -0.202639 |
| H                      | -3.515707 | 2.471755  | 0.358548  |
| H                      | -2.436595 | 4.658873  | 0.441693  |
| H                      | -4.156093 | -3.388801 | -0.522093 |
| H                      | -5.472762 | -1.278814 | -0.664343 |
| H                      | -4.348857 | 0.871753  | -0.398076 |
| C                      | 1.925884  | 0.220077  | -0.243414 |
| C                      | 2.835465  | 1.062713  | 0.442176  |
| C                      | 2.481863  | -0.710241 | -1.158414 |
| C                      | 4.194123  | 0.973841  | 0.231394  |
| H                      | 2.465497  | 1.737162  | 1.202612  |
| C                      | 3.852274  | -0.778038 | -1.375553 |
| H                      | 1.821876  | -1.317944 | -1.760744 |
| C                      | 4.718221  | 0.055122  | -0.686149 |
| H                      | 4.862992  | 1.609078  | 0.800363  |
| H                      | 4.239674  | -1.484575 | -2.100449 |
| H                      | 5.787177  | -0.003991 | -0.850351 |
| S                      | 0.676464  | -2.501503 | 0.448085  |
| C                      | 1.687327  | -2.126178 | 1.917101  |
| H                      | 1.022046  | -1.950936 | 2.761708  |
| H                      | 2.287663  | -3.017142 | 2.094287  |
| H                      | 2.331465  | -1.268812 | 1.751307  |



| E-2 - MPPS PCM (Water) |           |           |           |
|------------------------|-----------|-----------|-----------|
| Atom                   | X         | Y         | Z         |
| C                      | 0.042681  | 3.916287  | 0.352709  |
| C                      | 0.70052   | 2.719639  | 0.190506  |
| C                      | 0.001014  | 1.480079  | 0.130417  |
| C                      | -1.434459 | 1.539829  | 0.091379  |
| C                      | -2.063653 | 2.764118  | 0.298806  |
| C                      | -1.348721 | 3.944115  | 0.451444  |
| C                      | 0.649989  | 0.223301  | 0.02438   |
| C                      | -2.213609 | 0.338154  | -0.267581 |
| C                      | -1.570487 | -0.931176 | -0.241647 |
| C                      | -0.198488 | -0.969277 | 0.112758  |
| C                      | -2.320711 | -2.083119 | -0.564708 |
| H                      | -1.82531  | -3.044637 | -0.59735  |
| C                      | -3.65827  | -1.992883 | -0.897977 |
| C                      | -4.282948 | -0.750738 | -0.934115 |
| C                      | -3.554932 | 0.39769   | -0.630849 |
| H                      | 0.61194   | 4.83644   | 0.410622  |
| H                      | 1.775817  | 2.726779  | 0.105865  |
| H                      | -3.144044 | 2.811732  | 0.327723  |
| H                      | -1.871775 | 4.878043  | 0.615861  |
| H                      | -4.211422 | -2.889566 | -1.151315 |
| H                      | -5.327514 | -0.669292 | -1.207989 |
| H                      | -4.059827 | 1.352957  | -0.683412 |
| C                      | 2.075735  | 0.028345  | -0.214796 |
| C                      | 3.090952  | 0.722682  | 0.47498   |
| C                      | 2.487019  | -0.928861 | -1.168818 |
| C                      | 4.428587  | 0.489226  | 0.206766  |
| H                      | 2.828576  | 1.405648  | 1.271405  |
| C                      | 3.825914  | -1.145678 | -1.442403 |
| H                      | 1.734256  | -1.480173 | -1.719436 |
| C                      | 4.810262  | -0.438095 | -0.758842 |
| H                      | 5.183859  | 1.025833  | 0.769465  |
| H                      | 4.104542  | -1.871896 | -2.197265 |
| H                      | 5.858556  | -0.614227 | -0.966717 |
| S                      | 0.551631  | -2.281854 | 0.950043  |
| C                      | -0.73223  | -3.049633 | 1.986996  |
| H                      | -1.303534 | -3.797421 | 1.444746  |
| H                      | -0.191843 | -3.526811 | 2.803372  |
| H                      | -1.393378 | -2.277789 | 2.3773    |

| G-1 - MPTS (gas phase) |           |           |           |
|------------------------|-----------|-----------|-----------|
| Atom                   | X         | Y         | Z         |
| C                      | 0.037867  | 3.824279  | -0.282307 |
| C                      | -0.550429 | 2.587249  | -0.200069 |
| C                      | 0.225408  | 1.412044  | -0.110554 |
| C                      | 1.633202  | 1.516822  | -0.104249 |
| C                      | 2.208052  | 2.799619  | -0.194306 |
| C                      | 1.432916  | 3.929839  | -0.281382 |
| C                      | -0.409864 | 0.112474  | -0.022046 |
| C                      | 2.436931  | 0.310767  | 0.000362  |
| C                      | 1.79625   | -0.943428 | 0.114001  |
| C                      | 0.347172  | -1.012551 | 0.091952  |
| C                      | 2.587965  | -2.102859 | 0.239895  |
| H                      | 2.090209  | -3.055917 | 0.352445  |
| C                      | 3.958623  | -2.036274 | 0.239787  |
| C                      | 4.594795  | -0.796817 | 0.11555   |
| C                      | 3.845233  | 0.347675  | 0.002098  |
| H                      | -0.576187 | 4.71427   | -0.348259 |
| H                      | -1.628626 | 2.503943  | -0.204021 |
| H                      | 3.282983  | 2.911123  | -0.192029 |
| H                      | 1.90458   | 4.903     | -0.347568 |
| H                      | 4.544748  | -2.941907 | 0.339944  |
| H                      | 5.676526  | -0.736821 | 0.113341  |
| H                      | 4.359518  | 1.294003  | -0.087119 |
| C                      | -1.902731 | 0.049991  | -0.087764 |
| C                      | -2.520488 | 0.037877  | -1.335109 |
| C                      | -2.683351 | 0.045595  | 1.07483   |
| C                      | -3.90272  | 0.001417  | -1.449009 |
| H                      | -1.905063 | 0.063954  | -2.227578 |
| C                      | -4.068889 | 0.013556  | 0.94396   |
| C                      | -4.680311 | -0.011667 | -0.301512 |
| H                      | -4.366889 | -0.011283 | -2.427901 |
| H                      | -4.680157 | 0.006917  | 1.839846  |
| H                      | -5.76124  | -0.037065 | -0.373156 |
| S                      | -0.461827 | -2.604718 | 0.256145  |
| C                      | -0.435429 | -3.165955 | -1.473007 |
| H                      | 0.583223  | -3.20097  | -1.857525 |
| H                      | -0.855451 | -4.171602 | -1.481437 |
| H                      | -1.050211 | -2.517306 | -2.095122 |
| C                      | -2.048164 | 0.049661  | 2.438202  |
| H                      | -1.550797 | -0.9034   | 2.637133  |
| H                      | -1.293123 | 0.833253  | 2.529308  |
| H                      | -2.797022 | 0.20541   | 3.215449  |

| E-1 - MPTS (gas phase) |          |          |          |
|------------------------|----------|----------|----------|
| Atom                   | X        | Y        | Z        |
| C                      | 1.100757 | 3.879497 | 0.079549 |
| C                      | 0.197411 | 2.842846 | 0.13541  |

| Atom | G-2 -MPTS (gas phase) |           |           |
|------|-----------------------|-----------|-----------|
|      | X                     | Y         | Z         |
| C    | 0.117577              | 3.820188  | -0.010497 |
| C    | 0.6569                | 2.56421   | -0.131496 |
| C    | -0.158707             | 1.412932  | -0.128968 |
| C    | -1.557417             | 1.56394   | -0.018748 |
| C    | -2.082026             | 2.864916  | 0.109238  |
| C    | -1.267612             | 3.970515  | 0.116582  |
| C    | 0.42983               | 0.09118   | -0.223076 |
| C    | -2.405549             | 0.384921  | -0.065085 |
| C    | -1.814919             | -0.889197 | -0.216358 |
| C    | -0.368681             | -1.01174  | -0.251262 |
| C    | -2.65339              | -2.015863 | -0.337066 |
| H    | -2.198346             | -2.982041 | -0.504948 |
| C    | -4.0196               | -1.901694 | -0.277241 |
| C    | -4.604656             | -0.644748 | -0.092826 |
| C    | -3.810078             | 0.470506  | 0.00344   |
| H    | 0.762263              | 4.690766  | -0.015828 |
| H    | 1.727238              | 2.446911  | -0.234714 |
| H    | -3.14906              | 3.01051   | 0.199862  |
| H    | -1.700824             | 4.958706  | 0.214815  |
| H    | -4.641723             | -2.782749 | -0.379416 |
| H    | -5.682276             | -0.547193 | -0.038873 |
| H    | -4.285586             | 1.433206  | 0.126287  |
| C    | 1.919966              | -0.01345  | -0.288691 |
| C    | 2.701133              | 0.051928  | 0.872435  |
| C    | 2.536533              | -0.148335 | -1.52881  |
| C    | 4.085206              | -0.038519 | 0.747686  |
| C    | 3.916426              | -0.231131 | -1.636922 |
| H    | 1.920454              | -0.193953 | -2.419507 |
| C    | 4.694577              | -0.178239 | -0.490841 |
| H    | 4.696336              | 0.001401  | 1.642898  |
| H    | 4.378592              | -0.340529 | -2.610598 |
| H    | 5.773945              | -0.24619  | -0.558173 |
| S    | 0.375373              | -2.638144 | -0.377703 |
| C    | 0.052698              | -3.298097 | 1.287147  |
| H    | -1.011329             | -3.303643 | 1.51868   |
| H    | 0.422431              | -4.323352 | 1.284968  |
| H    | 0.5944                | -2.730115 | 2.041252  |
| C    | 2.075342              | 0.224995  | 2.230949  |
| H    | 2.818917              | 0.101339  | 3.01892   |
| H    | 1.632679              | 1.218674  | 2.339798  |
| H    | 1.274602              | -0.496747 | 2.400288  |

|   |           |           |           |
|---|-----------|-----------|-----------|
| C | 0.600897  | 1.495696  | 0.011197  |
| C | 1.992369  | 1.217081  | -0.057374 |
| C | 2.883642  | 2.294829  | -0.12953  |
| C | 2.457529  | 3.607297  | -0.080747 |
| C | -0.347948 | 0.411331  | 0.029569  |
| C | 2.474694  | -0.17257  | -0.002845 |
| C | 1.54197   | -1.24293  | 0.0013    |
| C | 0.144288  | -0.929473 | -0.036601 |
| C | 2.034483  | -2.566266 | 0.014585  |
| H | 1.334431  | -3.391279 | -0.009441 |
| C | 3.382977  | -2.832568 | 0.061224  |
| C | 4.299652  | -1.782712 | 0.084219  |
| C | 3.838841  | -0.480948 | 0.048955  |
| H | 0.75444   | 4.902196  | 0.171638  |
| H | -0.846296 | 3.068568  | 0.299249  |
| H | 3.944361  | 2.107954  | -0.219604 |
| H | 3.17808   | 4.413742  | -0.140368 |
| H | 3.727897  | -3.859792 | 0.07869   |
| H | 5.363432  | -1.981136 | 0.124261  |
| H | 4.568372  | 0.316539  | 0.065481  |
| C | -1.773809 | 0.560452  | 0.142214  |
| C | -2.512984 | -0.382329 | 0.962339  |
| C | -2.52477  | 1.446706  | -0.666301 |
| C | -3.900092 | -0.518428 | 0.755596  |
| C | -3.884006 | 1.306391  | -0.808093 |
| H | -2.002459 | 2.174134  | -1.273423 |
| C | -4.58237  | 0.289129  | -0.12145  |
| H | -4.441557 | -1.240529 | 1.358106  |
| H | -4.419071 | 1.958295  | -1.488654 |
| H | -5.650194 | 0.173676  | -0.259303 |
| S | -1.028568 | -2.180594 | -0.290475 |
| C | -1.776426 | -1.856894 | -1.921873 |
| H | -1.03478  | -2.091748 | -2.684656 |
| H | -2.632966 | -2.523809 | -2.012717 |
| H | -2.092824 | -0.821042 | -2.004465 |
| C | -1.953626 | -0.837291 | 2.286061  |
| H | -2.497804 | -1.704554 | 2.663515  |
| H | -0.890561 | -1.076542 | 2.23971   |
| H | -2.066291 | -0.028254 | 3.015161  |

| G-1 - MPTS PCM (ACN) |           |           |           |
|----------------------|-----------|-----------|-----------|
| Atom                 | X         | Y         | Z         |
| C                    | -0.02352  | 3.818619  | -0.343777 |
| C                    | -0.595114 | 2.57433   | -0.242225 |
| C                    | 0.196434  | 1.411091  | -0.130413 |
| C                    | 1.60278   | 1.535965  | -0.122388 |
| C                    | 2.16173   | 2.825086  | -0.231897 |
| C                    | 1.370766  | 3.943542  | -0.340188 |
| C                    | -0.421699 | 0.103546  | -0.029348 |
| C                    | 2.4233    | 0.342396  | 0.002893  |
| C                    | 1.79963   | -0.919981 | 0.12649   |
| C                    | 0.351107  | -1.009992 | 0.094379  |
| C                    | 2.608473  | -2.065677 | 0.274217  |
| H                    | 2.129536  | -3.027774 | 0.390823  |
| C                    | 3.978743  | -1.978423 | 0.286663  |
| C                    | 4.597627  | -0.730414 | 0.152285  |
| C                    | 3.831577  | 0.401793  | 0.016976  |
| H                    | -0.64925  | 4.698878  | -0.427302 |
| H                    | -1.672292 | 2.478163  | -0.248487 |
| H                    | 3.234832  | 2.952556  | -0.229686 |
| H                    | 1.829212  | 4.921686  | -0.421699 |
| H                    | 4.577399  | -2.873794 | 0.402735  |
| H                    | 5.678174  | -0.653973 | 0.159078  |
| H                    | 4.333494  | 1.354094  | -0.07911  |
| C                    | -1.913875 | 0.022049  | -0.091586 |
| C                    | -2.532835 | -0.081184 | -1.334404 |
| C                    | -2.691733 | 0.084067  | 1.071977  |
| C                    | -3.915513 | -0.142303 | -1.441269 |
| H                    | -1.920744 | -0.113958 | -2.228757 |
| C                    | -4.078131 | 0.024705  | 0.948292  |
| C                    | -4.691507 | -0.089628 | -0.292422 |
| H                    | -4.381138 | -0.227198 | -2.415867 |
| H                    | -4.687701 | 0.069135  | 1.844251  |
| H                    | -5.772201 | -0.133564 | -0.359439 |
| S                    | -0.434961 | -2.613016 | 0.263574  |
| C                    | -0.243488 | -3.268326 | -1.422803 |
| H                    | 0.806914  | -3.330235 | -1.702568 |
| H                    | -0.671844 | -4.270063 | -1.416747 |
| H                    | -0.785934 | -2.649235 | -2.135194 |
| C                    | -2.053986 | 0.192325  | 2.430758  |
| H                    | -1.485858 | -0.710132 | 2.671532  |
| H                    | -1.358025 | 1.032641  | 2.481711  |
| H                    | -2.80978  | 0.329514  | 3.204283  |

| G-2 - MPTS PCM (ACN) |           |           |           |
|----------------------|-----------|-----------|-----------|
| Atom                 | X         | Y         | Z         |
| C                    | 0.121142  | 3.824075  | 0.012412  |
| C                    | 0.660441  | 2.567509  | -0.110939 |
| C                    | -0.156094 | 1.416318  | -0.119217 |
| C                    | -1.555684 | 1.568329  | -0.015549 |
| C                    | -2.081528 | 2.869489  | 0.114233  |
| C                    | -1.265566 | 3.974932  | 0.130905  |
| C                    | 0.431966  | 0.094068  | -0.215332 |
| C                    | -2.404911 | 0.389655  | -0.068853 |
| C                    | -1.814407 | -0.886035 | -0.21413  |
| C                    | -0.367583 | -1.008356 | -0.243365 |
| C                    | -2.654709 | -2.012048 | -0.336393 |
| H                    | -2.205591 | -2.983113 | -0.490261 |
| C                    | -4.021966 | -1.895275 | -0.28797  |
| C                    | -4.606597 | -0.636054 | -0.112413 |
| C                    | -3.810507 | 0.478819  | -0.011659 |
| H                    | 0.766376  | 4.694155  | 0.017648  |
| H                    | 1.73187   | 2.452023  | -0.203376 |
| H                    | -3.148645 | 3.016928  | 0.200106  |
| H                    | -1.69859  | 4.962847  | 0.231269  |
| H                    | -4.644503 | -2.776    | -0.3893   |
| H                    | -5.684312 | -0.536503 | -0.067177 |
| H                    | -4.286418 | 1.441903  | 0.106124  |
| C                    | 1.922165  | -0.010572 | -0.288621 |
| C                    | 2.71054   | 0.039236  | 0.869071  |
| C                    | 2.530342  | -0.130572 | -1.535424 |
| C                    | 4.09457   | -0.054182 | 0.734197  |
| C                    | 3.910315  | -0.215982 | -1.653699 |
| H                    | 1.909549  | -0.161437 | -2.423733 |
| C                    | 4.69612   | -0.180418 | -0.510705 |
| H                    | 4.711496  | -0.026366 | 1.625761  |
| H                    | 4.366284  | -0.312231 | -2.631782 |
| H                    | 5.774969  | -0.249663 | -0.585499 |
| S                    | 0.375905  | -2.635956 | -0.366293 |
| C                    | 0.018726  | -3.328397 | 1.279069  |
| H                    | -1.050997 | -3.370127 | 1.474187  |
| H                    | 0.420194  | -4.341227 | 1.273463  |
| H                    | 0.517896  | -2.752757 | 2.055659  |
| C                    | 2.094977  | 0.198837  | 2.233737  |
| H                    | 2.843366  | 0.063362  | 3.014679  |
| H                    | 1.659779  | 1.194339  | 2.355863  |
| H                    | 1.292268  | -0.521097 | 2.400905  |

| G-1 - MPTS PCM (CCL <sub>4</sub> ) |         |          |           |
|------------------------------------|---------|----------|-----------|
| Atom                               | X       | Y        | Z         |
| C                                  | 0.01032 | 3.822346 | -0.305533 |

| E-1 - MPTS PCM (ACN) |           |           |           |
|----------------------|-----------|-----------|-----------|
| Atom                 | X         | Y         | Z         |
| C                    | 0.261528  | 3.809634  | 0.018865  |
| C                    | -0.39794  | 2.606722  | -0.049341 |
| C                    | 0.304505  | 1.361538  | -0.012305 |
| C                    | 1.742094  | 1.411056  | 0.006189  |
| C                    | 2.368756  | 2.647323  | 0.104977  |
| C                    | 1.653837  | 3.841471  | 0.125718  |
| C                    | -0.371456 | 0.131748  | -0.073062 |
| C                    | 2.508865  | 0.160743  | -0.150497 |
| C                    | 1.820686  | -1.08485  | -0.103049 |
| C                    | 0.402139  | -1.099144 | 0.055957  |
| C                    | 2.573866  | -2.276732 | -0.207571 |
| H                    | 2.051847  | -3.225103 | -0.208465 |
| C                    | 3.947394  | -2.251646 | -0.355728 |
| C                    | 4.613087  | -1.033775 | -0.42686  |
| C                    | 3.888907  | 0.151942  | -0.330416 |
| H                    | -0.303359 | 4.734349  | -0.003631 |
| H                    | -1.475859 | 2.594002  | -0.137053 |
| H                    | 3.448055  | 2.700915  | 0.154903  |
| H                    | 2.179122  | 4.785206  | 0.205176  |
| H                    | 4.496755  | -3.181837 | -0.439039 |
| H                    | 5.68684   | -0.999817 | -0.563301 |
| H                    | 4.431795  | 1.085528  | -0.390519 |
| C                    | -1.832091 | 0.072907  | -0.330161 |
| C                    | -2.796463 | 0.415793  | 0.634813  |
| C                    | -2.252507 | -0.34109  | -1.597576 |
| C                    | -4.144975 | 0.342752  | 0.284521  |
| C                    | -3.596045 | -0.401116 | -1.930341 |
| H                    | -1.50253  | -0.613056 | -2.331863 |
| C                    | -4.550012 | -0.056206 | -0.981149 |
| H                    | -4.892509 | 0.59819   | 1.027672  |
| H                    | -3.896106 | -0.715194 | -2.923061 |
| H                    | -5.605393 | -0.101395 | -1.222698 |
| S                    | -0.211048 | -2.386116 | 1.04507   |
| C                    | -1.760827 | -3.006901 | 0.329676  |
| H                    | -1.625206 | -3.189162 | -0.734528 |
| H                    | -1.952313 | -3.944336 | 0.851845  |
| H                    | -2.585433 | -2.318528 | 0.495223  |
| C                    | -2.409869 | 0.806094  | 2.035605  |
| H                    | -3.293207 | 0.888432  | 2.669451  |
| H                    | -1.73917  | 0.065018  | 2.477109  |
| H                    | -1.887456 | 1.765059  | 2.062063  |

|   |           |           |           |
|---|-----------|-----------|-----------|
| C | -0.570442 | 2.58187   | -0.216325 |
| C | 0.212484  | 1.411866  | -0.118376 |
| C | 1.61965   | 1.525748  | -0.111131 |
| C | 2.18728   | 2.811548  | -0.20836  |
| C | 1.405041  | 3.936682  | -0.303274 |
| C | -0.415104 | 0.108555  | -0.025361 |
| C | 2.430976  | 0.325164  | 0.001069  |
| C | 1.7979    | -0.932667 | 0.118654  |
| C | 0.34903   | -1.011401 | 0.092416  |
| C | 2.597286  | -2.086039 | 0.253754  |
| H | 2.107359  | -3.042807 | 0.368923  |
| C | 3.967818  | -2.01039  | 0.258786  |
| C | 4.596319  | -0.767092 | 0.130034  |
| C | 3.839313  | 0.372007  | 0.007687  |
| H | -0.609115 | 4.708072  | -0.378073 |
| H | -1.648178 | 2.49266   | -0.221412 |
| H | 3.261449  | 2.930035  | -0.205806 |
| H | 1.870741  | 4.912285  | -0.374848 |
| H | 4.559561  | -2.911516 | 0.366152  |
| H | 5.677586  | -0.699838 | 0.131578  |
| H | 4.347884  | 1.321188  | -0.084137 |
| C | -1.907732 | 0.037877  | -0.089838 |
| C | -2.52617  | -0.008807 | -1.336039 |
| C | -2.686941 | 0.058117  | 1.073761  |
| C | -3.90861  | -0.054591 | -1.447314 |
| H | -1.9122   | -0.005042 | -2.229801 |
| C | -4.072882 | 0.016133  | 0.945584  |
| C | -4.685371 | -0.042608 | -0.298712 |
| H | -4.373588 | -0.094843 | -2.425096 |
| H | -4.683264 | 0.028444  | 1.84203   |
| H | -5.766265 | -0.075151 | -0.368637 |
| S | -0.44989  | -2.608114 | 0.259066  |
| C | -0.350507 | -3.211653 | -1.453557 |
| H | 0.683252  | -3.258999 | -1.793297 |
| H | -0.774024 | -4.215695 | -1.454892 |
| H | -0.935093 | -2.57599  | -2.116613 |
| C | -2.050198 | 0.100314  | 2.436112  |
| H | -1.526084 | -0.834861 | 2.650506  |
| H | -1.316538 | 0.90559   | 2.513401  |
| H | -2.802009 | 0.248424  | 3.211817  |

| E-1 - MPTS PCM (CCL <sub>4</sub> ) |  |  |  |
|------------------------------------|--|--|--|
|------------------------------------|--|--|--|

| G-2 MPTS PCM (CCL <sub>4</sub> ) |           |           |           |
|----------------------------------|-----------|-----------|-----------|
| Atom                             | X         | Y         | Z         |
| C                                | 0.119606  | 3.821551  | -0.001624 |
| C                                | 0.658674  | 2.565344  | -0.124939 |
| C                                | -0.157306 | 1.414122  | -0.125671 |
| C                                | -1.556199 | 1.565616  | -0.016746 |
| C                                | -2.081067 | 2.866555  | 0.113767  |
| C                                | -1.265983 | 3.972073  | 0.124521  |
| C                                | 0.430938  | 0.092048  | -0.219825 |
| C                                | -2.404964 | 0.386986  | -0.06695  |
| C                                | -1.814596 | -0.887829 | -0.215452 |
| C                                | -0.368182 | -1.010606 | -0.24643  |
| C                                | -2.653949 | -2.013888 | -0.338825 |
| H                                | -2.201204 | -2.982009 | -0.501382 |
| C                                | -4.020648 | -1.898237 | -0.28596  |
| C                                | -4.605412 | -0.640253 | -0.10534  |
| C                                | -3.80996  | 0.474474  | -0.005259 |
| H                                | 0.764602  | 4.691911  | -0.00354  |
| H                                | 1.72928   | 2.448618  | -0.22564  |
| H                                | -3.148084 | 3.012759  | 0.204035  |
| H                                | -1.698885 | 4.960156  | 0.22496   |
| H                                | -4.64314  | -2.778776 | -0.390101 |
| H                                | -5.683179 | -0.541503 | -0.05726  |
| H                                | -4.285289 | 1.43763   | 0.1147    |
| C                                | 1.921035  | -0.0132   | -0.28955  |
| C                                | 2.706775  | 0.049261  | 0.868894  |
| C                                | 2.532345  | -0.146942 | -1.532755 |
| C                                | 4.090588  | -0.043201 | 0.738512  |
| C                                | 3.912066  | -0.231635 | -1.646545 |
| H                                | 1.912965  | -0.189857 | -2.421388 |
| C                                | 4.694962  | -0.181783 | -0.503037 |
| H                                | 4.705279  | -0.005823 | 1.631379  |
| H                                | 4.370286  | -0.339926 | -2.622269 |
| H                                | 5.774021  | -0.251055 | -0.574706 |
| S                                | 0.37601   | -2.637802 | -0.365432 |
| C                                | 0.032129  | -3.307205 | 1.291665  |
| H                                | -1.035479 | -3.330413 | 1.50338   |
| H                                | 0.418447  | -4.32617  | 1.292699  |
| H                                | 0.55084   | -2.73215  | 2.056206  |
| C                                | 2.086957  | 0.220512  | 2.230332  |
| H                                | 2.833408  | 0.093543  | 3.014893  |
| H                                | 1.647616  | 1.215289  | 2.342917  |
| H                                | 1.285487  | -0.499974 | 2.401328  |

| Atom | X         | Y         | Z         |
|------|-----------|-----------|-----------|
| C    | 1.076401  | 3.883651  | 0.066282  |
| C    | 0.178549  | 2.84142   | 0.117895  |
| C    | 0.590436  | 1.495329  | 0.000797  |
| C    | 1.985035  | 1.226022  | -0.056416 |
| C    | 2.870681  | 2.308462  | -0.123071 |
| C    | 2.436425  | 3.6195    | -0.081269 |
| C    | -0.351726 | 0.405764  | 0.018175  |
| C    | 2.475843  | -0.161357 | 0.003463  |
| C    | 1.548239  | -1.23746  | -0.003565 |
| C    | 0.149726  | -0.935151 | -0.051453 |
| C    | 2.050224  | -2.558606 | 0.005749  |
| H    | 1.35556   | -3.387685 | -0.032433 |
| C    | 3.400304  | -2.816442 | 0.064332  |
| C    | 4.31038   | -1.760765 | 0.101592  |
| C    | 3.841189  | -0.4608   | 0.066284  |
| H    | 0.722698  | 4.904438  | 0.151665  |
| H    | -0.867754 | 3.062445  | 0.270621  |
| H    | 3.93344   | 2.128173  | -0.202607 |
| H    | 3.152865  | 4.429938  | -0.136584 |
| H    | 3.75161   | -3.841608 | 0.078751  |
| H    | 5.375092  | -1.952372 | 0.150611  |
| H    | 4.566096  | 0.340813  | 0.090488  |
| C    | -1.777649 | 0.549668  | 0.136813  |
| C    | -2.512387 | -0.381428 | 0.971757  |
| C    | -2.532238 | 1.430152  | -0.676328 |
| C    | -3.901027 | -0.512905 | 0.780917  |
| C    | -3.893049 | 1.295277  | -0.803731 |
| H    | -2.012553 | 2.146674  | -1.298517 |
| C    | -4.588732 | 0.290027  | -0.097185 |
| H    | -4.439731 | -1.22711  | 1.395008  |
| H    | -4.431364 | 1.940433  | -1.488085 |
| H    | -5.658576 | 0.178321  | -0.222456 |
| S    | -1.01152  | -2.198299 | -0.298575 |
| C    | -1.770706 | -1.880959 | -1.925557 |
| H    | -1.036499 | -2.122176 | -2.693392 |
| H    | -2.628862 | -2.547009 | -2.004834 |
| H    | -2.085711 | -0.845044 | -2.011053 |
| C    | -1.938333 | -0.841277 | 2.286834  |
| H    | -2.480575 | -1.707503 | 2.668932  |
| H    | -0.876631 | -1.083238 | 2.228158  |
| H    | -2.040301 | -0.033433 | 3.019033  |

| G-1 - MPTS PCM (MeOH) |           |           |           |
|-----------------------|-----------|-----------|-----------|
| Atom                  | X         | Y         | Z         |
| C                     | -0.023374 | 3.818625  | -0.343571 |
| C                     | -0.595003 | 2.57435   | -0.242087 |
| C                     | 0.19651   | 1.411083  | -0.130347 |
| C                     | 1.602857  | 1.535912  | -0.122329 |
| C                     | 2.161838  | 2.82502   | -0.231768 |
| C                     | 1.370912  | 3.943505  | -0.339985 |
| C                     | -0.421663 | 0.103554  | -0.029325 |
| C                     | 2.42334   | 0.342314  | 0.002884  |
| C                     | 1.799631  | -0.920042 | 0.126459  |
| C                     | 0.351108  | -1.01001  | 0.09437   |
| C                     | 2.608433  | -2.065768 | 0.274142  |
| H                     | 2.129432  | -3.02783  | 0.390786  |
| C                     | 3.978702  | -1.978566 | 0.286547  |
| C                     | 4.597627  | -0.73058  | 0.152171  |
| C                     | 3.831615  | 0.401652  | 0.016921  |
| H                     | -0.64908  | 4.698906  | -0.427039 |
| H                     | -1.672184 | 2.478203  | -0.248349 |
| H                     | 3.234945  | 2.952451  | -0.229549 |
| H                     | 1.829387  | 4.921641  | -0.421439 |
| H                     | 4.577329  | -2.873959 | 0.402602  |
| H                     | 5.678177  | -0.65418  | 0.158936  |
| H                     | 4.333556  | 1.353942  | -0.079155 |
| C                     | -1.913843 | 0.022106  | -0.091566 |
| C                     | -2.532821 | -0.080807 | -1.334397 |
| C                     | -2.691692 | 0.083889  | 1.07201   |
| C                     | -3.915498 | -0.141812 | -1.441272 |
| H                     | -1.92073  | -0.113378 | -2.228759 |
| C                     | -4.078088 | 0.024663  | 0.948315  |
| C                     | -4.691479 | -0.08934  | -0.292415 |
| H                     | -4.381135 | -0.226456 | -2.415887 |
| H                     | -4.687647 | 0.068914  | 1.844291  |
| H                     | -5.772176 | -0.133191 | -0.359436 |
| S                     | -0.435015 | -2.613011 | 0.263498  |
| C                     | -0.244065 | -3.267901 | -1.423092 |
| H                     | 0.806245  | -3.329555 | -1.703271 |
| H                     | -0.672246 | -4.269716 | -1.417117 |
| H                     | -0.786897 | -2.648757 | -2.135145 |
| C                     | -2.053924 | 0.191712  | 2.430811  |
| H                     | -1.486214 | -0.71104  | 2.671465  |
| H                     | -1.357584 | 1.031704  | 2.48189   |
| H                     | -2.809673 | 0.329123  | 3.204343  |

| G-2 - MPTS PCM (MeOH) |           |           |           |
|-----------------------|-----------|-----------|-----------|
| Atom                  | X         | Y         | Z         |
| C                     | 0.121171  | 3.824044  | 0.012327  |
| C                     | 0.660454  | 2.567476  | -0.111041 |
| C                     | -0.156087 | 1.416293  | -0.119256 |
| C                     | -1.555669 | 1.568314  | -0.015539 |
| C                     | -2.081491 | 2.869476  | 0.114272  |
| C                     | -1.265525 | 3.974911  | 0.130902  |
| C                     | 0.43196   | 0.094038  | -0.215348 |
| C                     | -2.404905 | 0.389653  | -0.068842 |
| C                     | -1.814415 | -0.886037 | -0.214133 |
| C                     | -0.367596 | -1.00838  | -0.243351 |
| C                     | -2.65472  | -2.012037 | -0.336444 |
| H                     | -2.205577 | -2.98308  | -0.490388 |
| C                     | -4.021972 | -1.895255 | -0.288032 |
| C                     | -4.606594 | -0.636037 | -0.112444 |
| C                     | -3.810496 | 0.478822  | -0.01166  |
| H                     | 0.766412  | 4.69412   | 0.017501  |
| H                     | 1.731873  | 2.451969  | -0.203564 |
| H                     | -3.148606 | 3.016911  | 0.200193  |
| H                     | -1.698537 | 4.962832  | 0.231282  |
| H                     | -4.644519 | -2.775967 | -0.389427 |
| H                     | -5.68431  | -0.536477 | -0.067231 |
| H                     | -4.286389 | 1.441916  | 0.106119  |
| C                     | 1.922157  | -0.010622 | -0.288638 |
| C                     | 2.710546  | 0.039314  | 0.869034  |
| C                     | 2.53032   | -0.130772 | -1.535427 |
| C                     | 4.09457   | -0.054087 | 0.734157  |
| C                     | 3.910287  | -0.216173 | -1.653705 |
| H                     | 1.90951   | -0.161766 | -2.423717 |
| C                     | 4.696103  | -0.180449 | -0.510734 |
| H                     | 4.711505  | -0.026175 | 1.625713  |
| H                     | 4.366242  | -0.312556 | -2.63178  |
| H                     | 5.774953  | -0.249695 | -0.585535 |
| S                     | 0.375892  | -2.635983 | -0.366179 |
| C                     | 0.018709  | -3.328191 | 1.279274  |
| H                     | -1.051013 | -3.369771 | 1.474463  |
| H                     | 0.420064  | -4.341068 | 1.273778  |
| H                     | 0.517985  | -2.75253  | 2.055784  |
| C                     | 2.094983  | 0.199013  | 2.23369   |
| H                     | 2.843389  | 0.06367   | 3.014642  |
| H                     | 1.659688  | 1.194483  | 2.355729  |
| H                     | 1.292336  | -0.520975 | 2.40093   |

| E-1 - MPTS PCM (MeOH) |           |           |           |
|-----------------------|-----------|-----------|-----------|
| Atom                  | X         | Y         | Z         |
| C                     | 0.261651  | 3.809617  | 0.01859   |
| C                     | -0.397864 | 2.606728  | -0.049545 |
| C                     | 0.30453   | 1.361545  | -0.012397 |
| C                     | 1.742099  | 1.411009  | 0.006116  |
| C                     | 2.36882   | 2.647255  | 0.104856  |
| C                     | 1.65395   | 3.841413  | 0.125489  |
| C                     | -0.371469 | 0.131747  | -0.073134 |
| C                     | 2.508822  | 0.160694  | -0.150489 |
| C                     | 1.820636  | -1.084889 | -0.102952 |
| C                     | 0.402072  | -1.099135 | 0.055928  |
| C                     | 2.573847  | -2.276764 | -0.207316 |
| H                     | 2.051855  | -3.225149 | -0.208107 |
| C                     | 3.947369  | -2.251669 | -0.355439 |
| C                     | 4.613058  | -1.033802 | -0.426718 |
| C                     | 3.888864  | 0.151899  | -0.330408 |
| H                     | -0.303197 | 4.734352  | -0.004029 |
| H                     | -1.475775 | 2.594035  | -0.13735  |
| H                     | 3.448123  | 2.700777  | 0.154832  |
| H                     | 2.179262  | 4.785136  | 0.204896  |
| H                     | 4.496746  | -3.181864 | -0.438626 |
| H                     | 5.68681   | -0.999853 | -0.563167 |
| H                     | 4.431711  | 1.085505  | -0.390626 |
| C                     | -1.832111 | 0.072946  | -0.330163 |
| C                     | -2.796414 | 0.415754  | 0.634908  |
| C                     | -2.252628 | -0.340891 | -1.597593 |
| C                     | -4.144951 | 0.342782  | 0.2847    |
| C                     | -3.596185 | -0.400851 | -1.930271 |
| H                     | -1.50269  | -0.612717 | -2.331971 |
| C                     | -4.550084 | -0.056036 | -0.980979 |
| H                     | -4.892427 | 0.598177  | 1.027925  |
| H                     | -3.896321 | -0.714767 | -2.92302  |
| H                     | -5.605482 | -0.101145 | -1.222474 |
| S                     | -0.211272 | -2.385909 | 1.045204  |
| C                     | -1.760542 | -3.007304 | 0.329228  |
| H                     | -1.624359 | -3.189963 | -0.734839 |
| H                     | -1.952122 | -3.944569 | 0.851677  |
| H                     | -2.58537  | -2.319022 | 0.494058  |
| C                     | -2.409684 | 0.805912  | 2.0357    |
| H                     | -3.292963 | 0.888232  | 2.669634  |
| H                     | -1.738965 | 0.064777  | 2.477077  |
| H                     | -1.887209 | 1.764841  | 2.062199  |

| G-1 - MPTS PCM (Water) |           |           |           |
|------------------------|-----------|-----------|-----------|
| Atom                   | X         | Y         | Z         |
| C                      | -0.02404  | 3.818682  | -0.344712 |
| C                      | -0.595522 | 2.574336  | -0.242914 |
| C                      | 0.196144  | 1.411196  | -0.130729 |
| C                      | 1.60249   | 1.536225  | -0.122621 |
| C                      | 2.161361  | 2.825391  | -0.23234  |
| C                      | 1.370259  | 3.943751  | -0.340984 |
| C                      | -0.421869 | 0.103599  | -0.029462 |
| C                      | 2.423137  | 0.342731  | 0.002917  |
| C                      | 1.799578  | -0.919718 | 0.126625  |
| C                      | 0.351046  | -1.009855 | 0.094447  |
| C                      | 2.608555  | -2.065324 | 0.274489  |
| H                      | 2.129912  | -3.027592 | 0.390864  |
| C                      | 3.978842  | -1.977912 | 0.287048  |
| C                      | 4.597603  | -0.72982  | 0.152624  |
| C                      | 3.831433  | 0.40232   | 0.017108  |
| H                      | -0.649833 | 4.698862  | -0.428539 |
| H                      | -1.672697 | 2.47813   | -0.249231 |
| H                      | 3.234437  | 2.953023  | -0.230066 |
| H                      | 1.828606  | 4.921918  | -0.422677 |
| H                      | 4.577587  | -2.87322  | 0.403089  |
| H                      | 5.678133  | -0.653261 | 0.159445  |
| H                      | 4.333297  | 1.354636  | -0.079085 |
| C                      | -1.914021 | 0.021937  | -0.091762 |
| C                      | -2.532821 | -0.082882 | -1.334556 |
| C                      | -2.691986 | 0.085102  | 1.071709  |
| C                      | -3.915504 | -0.144647 | -1.441438 |
| H                      | -1.920691 | -0.116654 | -2.228837 |
| C                      | -4.078396 | 0.024968  | 0.948006  |
| C                      | -4.691629 | -0.091052 | -0.292664 |
| H                      | -4.381017 | -0.230796 | -2.415976 |
| H                      | -4.688073 | 0.070316  | 1.843842  |
| H                      | -5.772299 | -0.135446 | -0.35972  |
| S                      | -0.434829 | -2.612925 | 0.264183  |
| C                      | -0.240816 | -3.270763 | -1.420982 |
| H                      | 0.810024  | -3.334179 | -1.698659 |
| H                      | -0.670195 | -4.272046 | -1.414274 |
| H                      | -0.781233 | -2.652004 | -2.135184 |
| C                      | -2.054437 | 0.195414  | 2.430442  |
| H                      | -1.485743 | -0.706361 | 2.672503  |
| H                      | -1.359011 | 1.036227  | 2.480383  |
| H                      | -2.810383 | 0.333184  | 3.203695  |

| G-2 - MPTS PCM (Water) |           |           |           |
|------------------------|-----------|-----------|-----------|
| Atom                   | X         | Y         | Z         |
| C                      | 0.121263  | 3.824166  | 0.012262  |
| C                      | 0.660559  | 2.567557  | -0.110957 |
| C                      | -0.156014 | 1.416368  | -0.119298 |
| C                      | -1.555635 | 1.568437  | -0.015778 |
| C                      | -2.081502 | 2.86962   | 0.113919  |
| C                      | -1.26548  | 3.975058  | 0.130614  |
| C                      | 0.432018  | 0.094083  | -0.215235 |
| C                      | -2.404906 | 0.38978   | -0.069066 |
| C                      | -1.814424 | -0.886005 | -0.213929 |
| C                      | -0.367566 | -1.00834  | -0.24304  |
| C                      | -2.654809 | -2.012026 | -0.335918 |
| H                      | -2.20588  | -2.983279 | -0.489079 |
| C                      | -4.022093 | -1.895146 | -0.287766 |
| C                      | -4.60668  | -0.635801 | -0.112779 |
| C                      | -3.810532 | 0.479088  | -0.012202 |
| H                      | 0.76651   | 4.694228  | 0.017619  |
| H                      | 1.732017  | 2.452111  | -0.203076 |
| H                      | -3.148602 | 3.017127  | 0.199826  |
| H                      | -1.698488 | 4.962967  | 0.231001  |
| H                      | -4.644652 | -2.775892 | -0.388701 |
| H                      | -5.684385 | -0.53616  | -0.067729 |
| H                      | -4.28647  | 1.442207  | 0.105208  |
| C                      | 1.922223  | -0.010538 | -0.288619 |
| C                      | 2.710696  | 0.039179  | 0.869051  |
| C                      | 2.530306  | -0.130365 | -1.53553  |
| C                      | 4.094738  | -0.054461 | 0.734044  |
| C                      | 3.910301  | -0.215956 | -1.653941 |
| H                      | 1.909484  | -0.16094  | -2.42384  |
| C                      | 4.696201  | -0.180698 | -0.510945 |
| H                      | 4.711741  | -0.026674 | 1.625544  |
| H                      | 4.366205  | -0.31198  | -2.632079 |
| H                      | 5.77504   | -0.249974 | -0.585819 |
| S                      | 0.375797  | -2.636053 | -0.365726 |
| C                      | 0.018171  | -3.329168 | 1.279279  |
| H                      | -1.051616 | -3.371762 | 1.473698  |
| H                      | 0.420362  | -4.341695 | 1.27366   |
| H                      | 0.516447  | -2.753258 | 2.056225  |
| C                      | 2.095312  | 0.198945  | 2.233769  |
| H                      | 2.84384   | 0.063755  | 3.014603  |
| H                      | 1.66009   | 1.194455  | 2.355712  |
| H                      | 1.292718  | -0.52105  | 2.401245  |

| E-1 - MPTS PCM (Water) |           |           |           |
|------------------------|-----------|-----------|-----------|
| Atom                   | X         | Y         | Z         |
| C                      | 0.261141  | 3.809838  | 0.017867  |
| C                      | -0.398265 | 2.606931  | -0.050455 |
| C                      | 0.304252  | 1.361483  | -0.012715 |
| C                      | 1.74207   | 1.411306  | 0.006463  |
| C                      | 2.368526  | 2.647522  | 0.105163  |
| C                      | 1.653462  | 3.841797  | 0.12537   |
| C                      | -0.371442 | 0.131983  | -0.073006 |
| C                      | 2.509008  | 0.160918  | -0.149932 |
| C                      | 1.820723  | -1.084728 | -0.102906 |
| C                      | 0.402242  | -1.099155 | 0.056797  |
| C                      | 2.573933  | -2.276567 | -0.208384 |
| H                      | 2.051922  | -3.22493  | -0.210241 |
| C                      | 3.947571  | -2.251381 | -0.356365 |
| C                      | 4.613307  | -1.033534 | -0.426286 |
| C                      | 3.889025  | 0.152253  | -0.329354 |
| H                      | -0.303771 | 4.734529  | -0.004994 |
| H                      | -1.47616  | 2.594206  | -0.138414 |
| H                      | 3.44781   | 2.701337  | 0.155305  |
| H                      | 2.178704  | 4.785549  | 0.20487   |
| H                      | 4.496868  | -3.181541 | -0.440427 |
| H                      | 5.68711   | -0.999434 | -0.562272 |
| H                      | 4.432028  | 1.085827  | -0.388648 |
| C                      | -1.832101 | 0.072839  | -0.330093 |
| C                      | -2.796475 | 0.416192  | 0.63466   |
| C                      | -2.252399 | -0.341961 | -1.597307 |
| C                      | -4.144988 | 0.342964  | 0.28433   |
| C                      | -3.595931 | -0.402131 | -1.930139 |
| H                      | -1.50249  | -0.614754 | -2.331369 |
| C                      | -4.549945 | -0.056633 | -0.981179 |
| H                      | -4.892582 | 0.598632  | 1.027332  |
| H                      | -3.895917 | -0.716993 | -2.922629 |
| H                      | -5.605319 | -0.102054 | -1.222713 |
| S                      | -0.210036 | -2.387593 | 1.044323  |
| C                      | -1.761931 | -3.006251 | 0.33174   |
| H                      | -1.628727 | -3.187931 | -0.732844 |
| H                      | -1.952743 | -3.943975 | 0.853597  |
| H                      | -2.585663 | -2.317514 | 0.499831  |
| C                      | -2.410059 | 0.807464  | 2.035254  |
| H                      | -3.29312  | 0.885987  | 2.669942  |
| H                      | -1.735968 | 0.06896   | 2.475832  |
| H                      | -1.89175  | 1.768694  | 2.061532  |
